# Supplementary material for: Selective oxidation of methacrolein to methacrylic acid over H4PMo11VO40/C3N4-SBA-15
Source: Royal Society of Chemistry journal article supplement (doi:10.1039/c9ra06021a), 2019-01-01
Supplement: c9ra06021a1.pdf [file c9ra06021a1.pdf]

## Supporting Information

### Selective Oxidation of Methacrolein to Methacrylic Acid over $\text{H}_4\text{PMo}_{11}\text{VO}_{40}/\text{C}_3\text{N}_4\text{-SBA-15}$

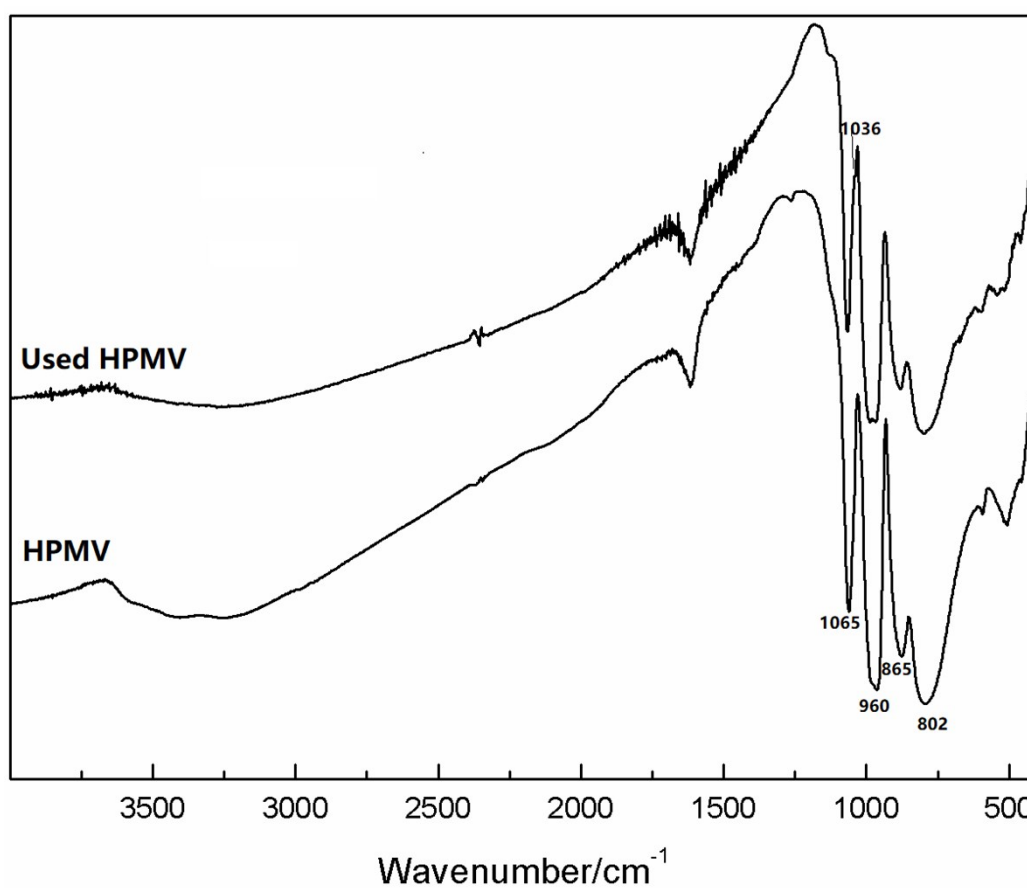

Figure S1. FT-IR spectra of HPMV before calcination (HPMV) and after reaction (Used HPMV)

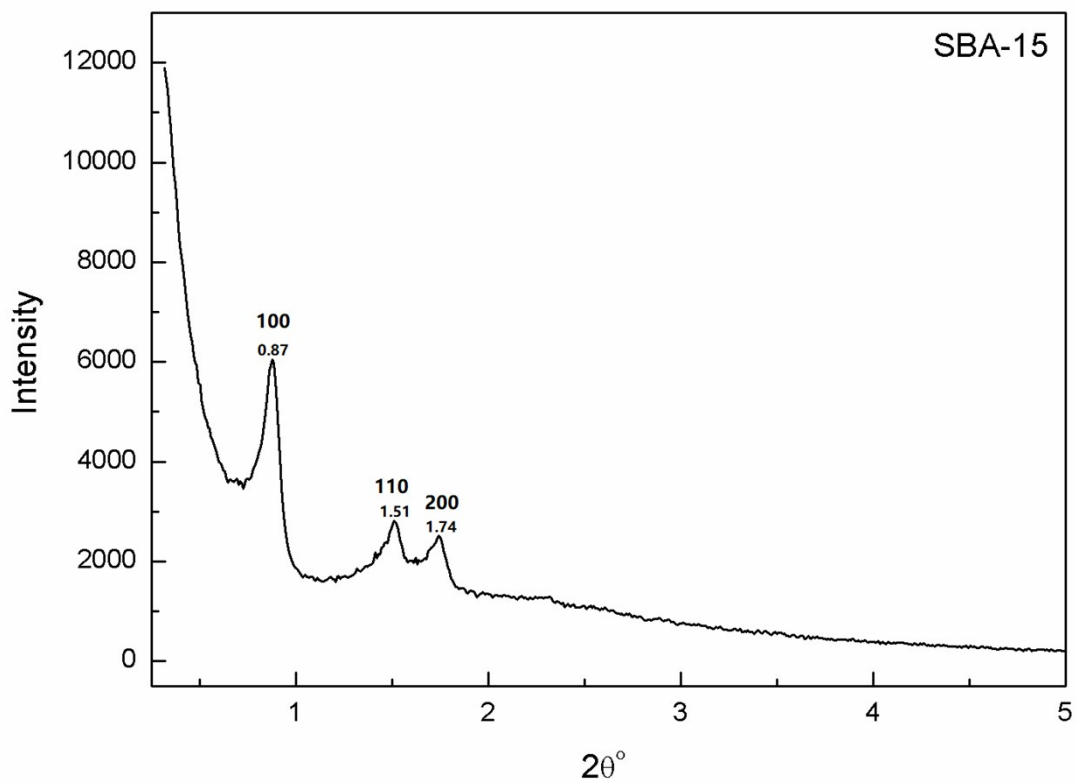

Figure S2. Small angle XRD patterns of SBA-15

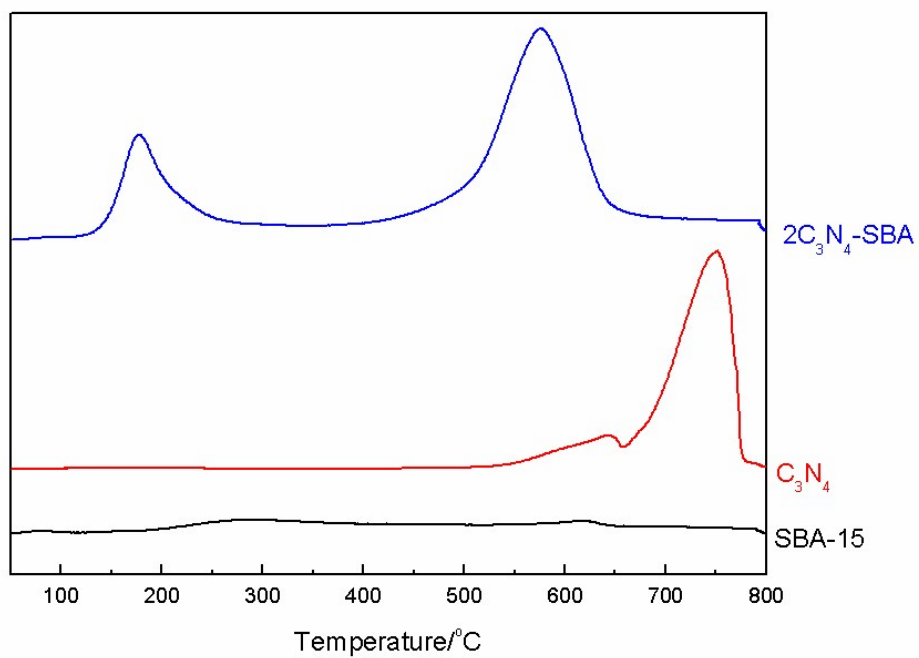

Figure S3. CO<sub>2</sub>-TPD curves of SBA-15, C<sub>3</sub>N<sub>4</sub> and C<sub>3</sub>N<sub>4</sub>-SBA

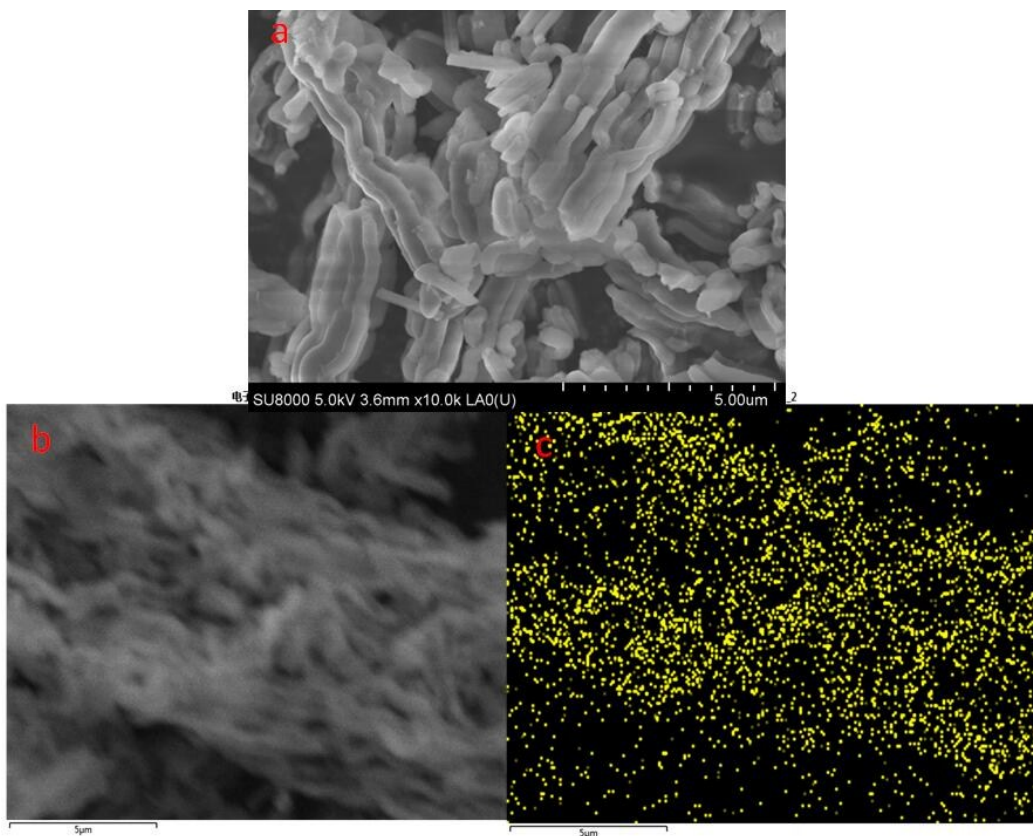

Figure S4. The SEM image of SBA-15 (a) and CN-SBA (b) and N dispersion of CN-SBA (c)

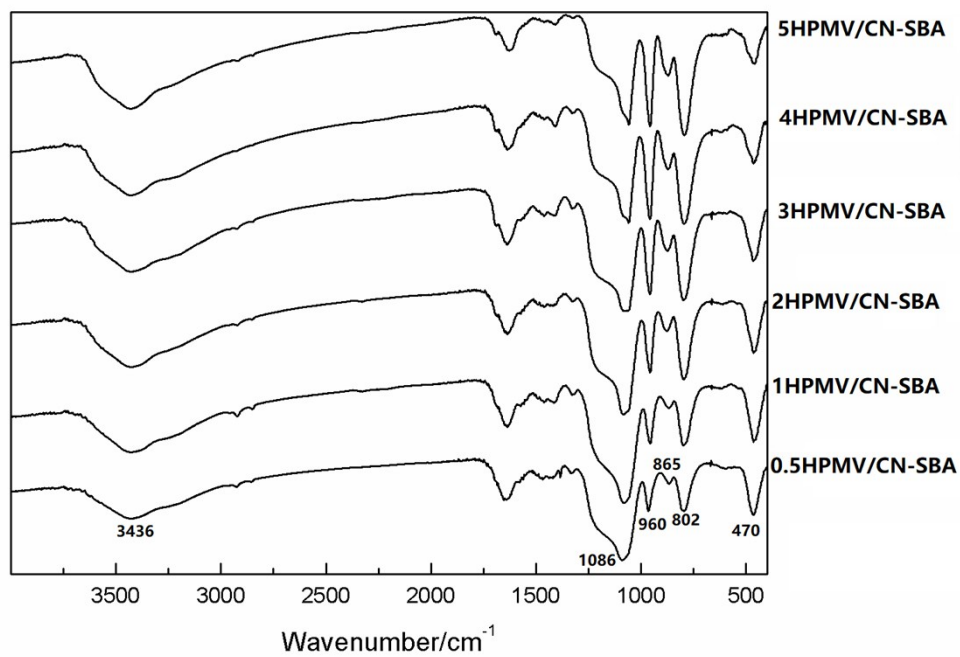

Figure S5. FT-IR spectra of HPMV/CN-SBA catalysts before calcination with different HPMV loading amount. Catalysts were prepared at 80 °C with 2 h mixing

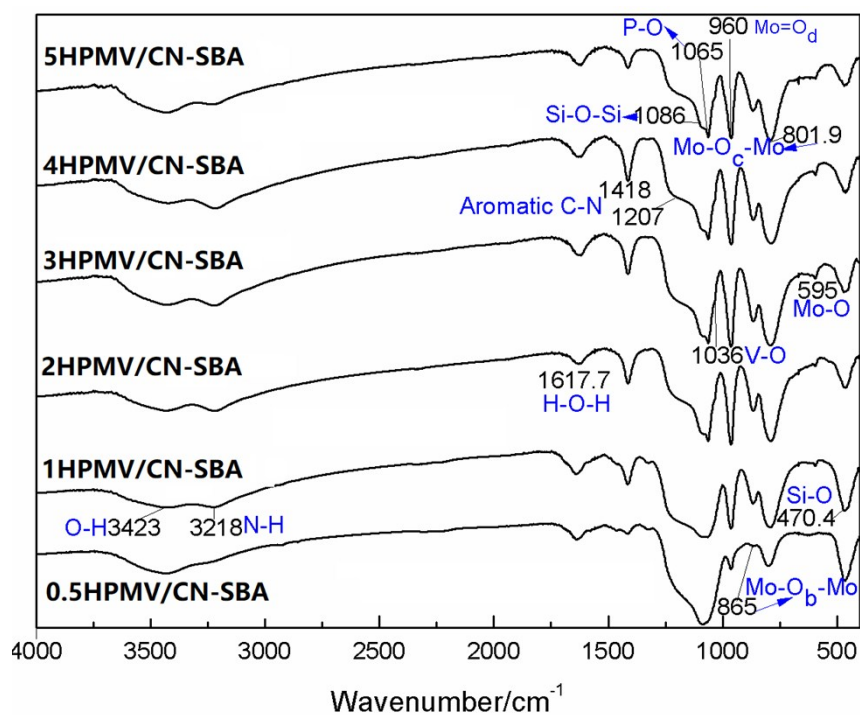

Figure S6. FT-IR spectra of HPMV/CN-SBA catalysts following calcinations with different HPMV loading. Catalysts were prepared at 80 °C with 2 hours mixing and calcined at 360 °C for 12 h)

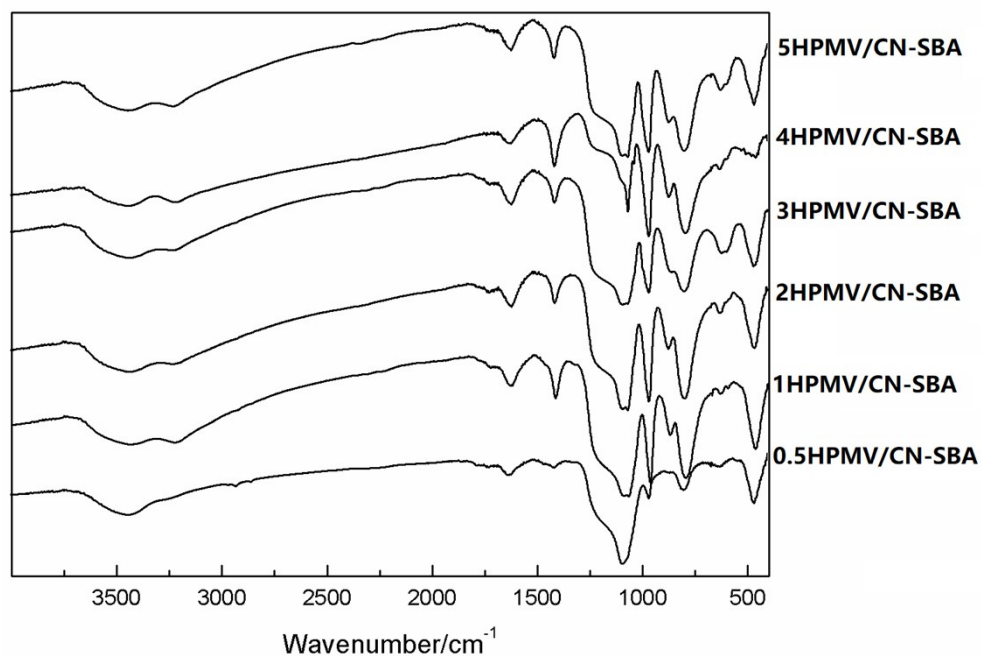

Figure S7. FT-IR spectra of HPMV-CN-SBA catalysts post reaction with different HPMV loading. Catalysts were prepared at 80 °C with 2 h mixing and calcined at 360 °C for 12 h. MAL reaction conditions were: the volume percent (vol.%) of MAL, O<sub>2</sub> and H<sub>2</sub>O in the reactant stream was 4.4, 11.1, and 17.8, with the

balance N<sub>2</sub> at 310 °C with 16 h.

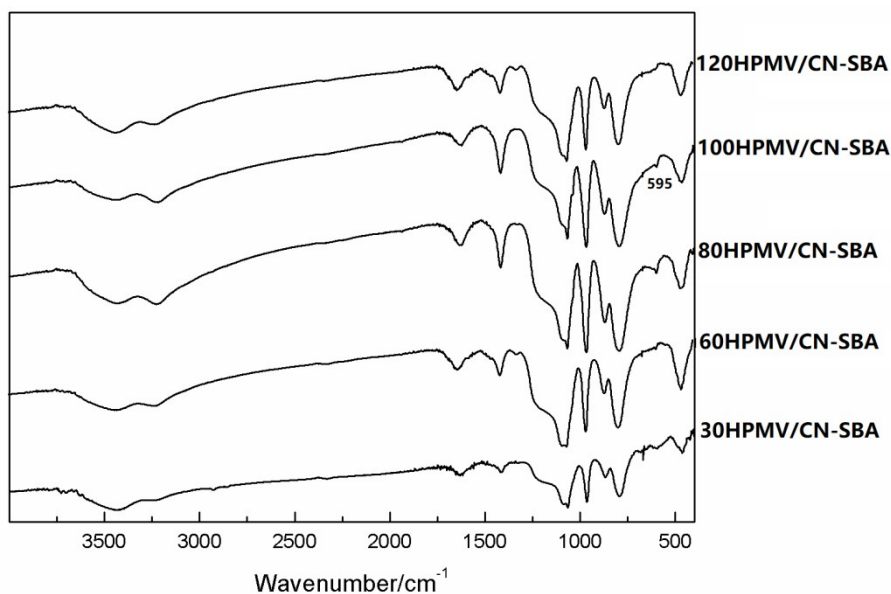

Figure S8. FT-IR spectra of calcined 2HPMV/CN-SBA synthesized at different temperature. Catalysts were prepared at temperature ranging from 30-120 oC with 2 h mixing and calcined at 360 °C for 12 h. Catalysts synthesis temperature indicated by prefix to HPMV/CN-SBA

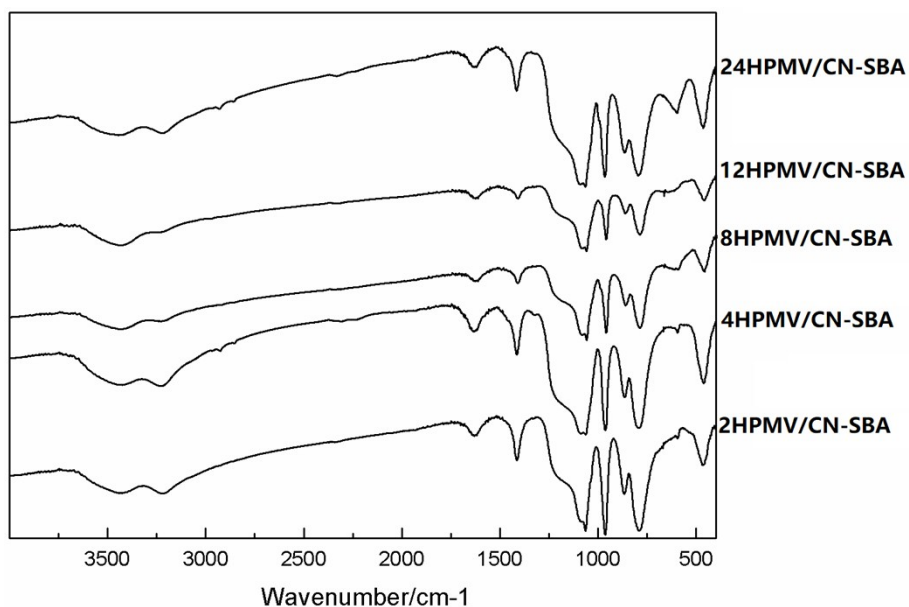

Figure S9. FT-IR spectra of calcined 2HPMV/CN-SBA synthesized with different mixing times. Catalysts were prepared at mixing times ranging from 2-24 h at a temperature of 80 °C and calcined at 360 °C for 12 h. Catalysts mixing time during synthesis indicated by prefix to HPMV/CN-SBA

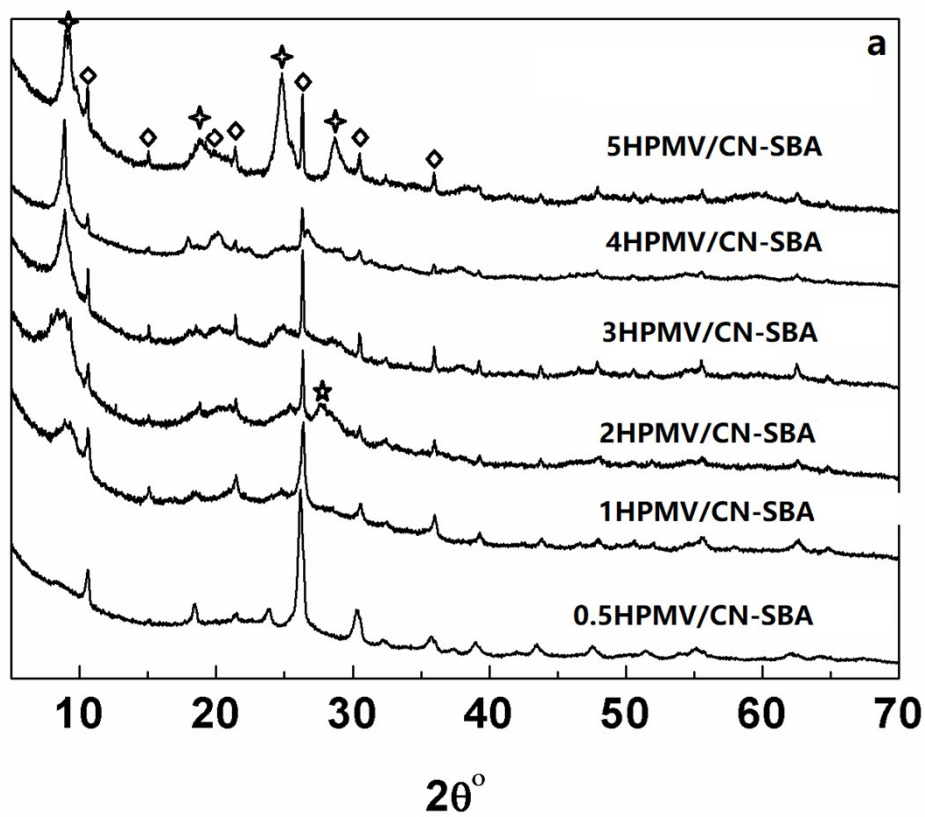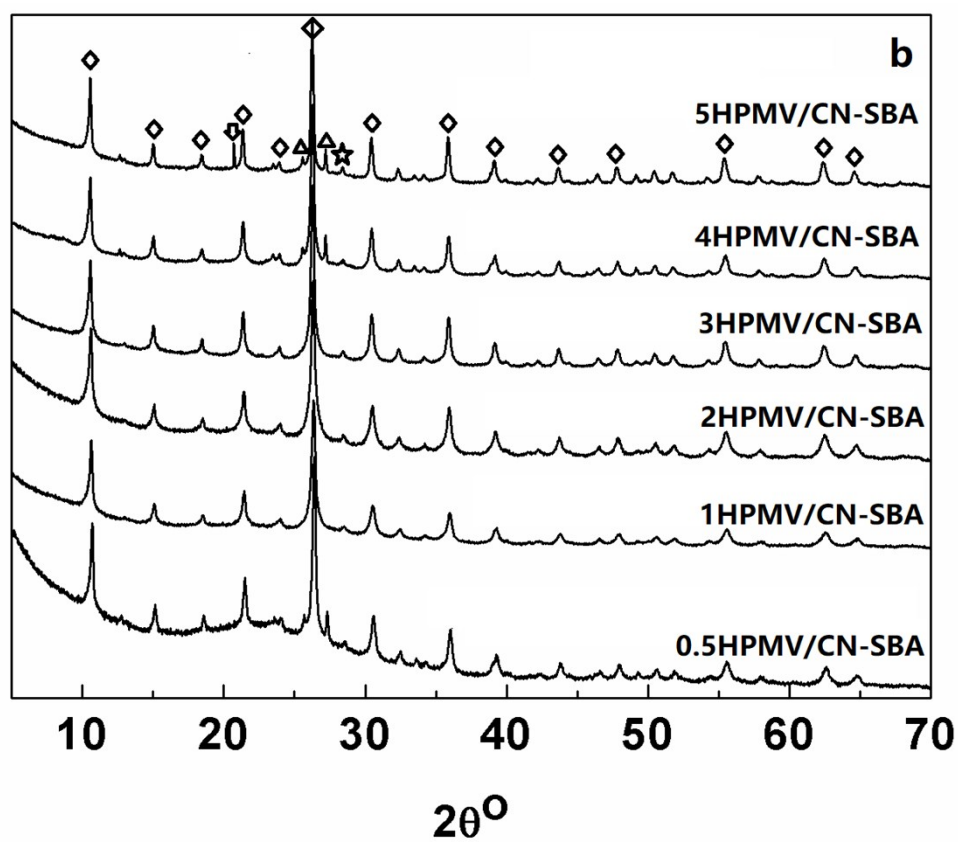

Figure S10. XRD patterns of supported catalysts with different supporting amount before (a) and after calcination (b) (quadrangular star, HPMV; arrow,  $V_2O_5$ ;

$\triangle$ ,  $\text{MoO}_3$ ;  $\diamond$ ,  $(\text{NH}_4)_x\text{H}_{4-x}\text{PMo}_{11}\text{VO}_{40}$ ;  $\star$ ,  $\text{C}_3\text{N}_4$ )

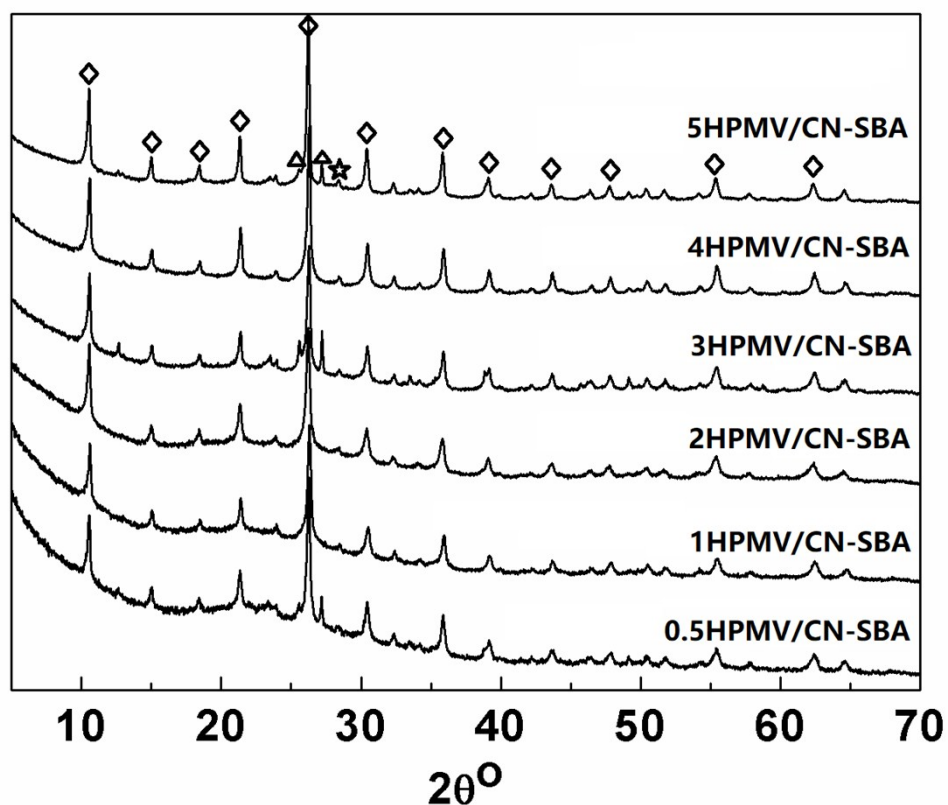

Figure S11. XRD patterns of HPMV/CN-SBA catalysts post-reaction with different HPMV loadings. Catalysts were prepared at 80 °C with 2 h mixing and calcined at 360 °C for 12 h. Reaction conditions were the volume percent (vol.%) of MAL,  $\text{O}_2$  and  $\text{H}_2\text{O}$  in the reactant stream was 4.4, 11.1, and 17.8, with the balance  $\text{N}_2$  at 310 °C with 16 h. Peak identification: quadrangular star = HPAV; arrow =  $\text{V}_2\text{O}_5$ ;

$\triangle = \text{MoO}_3$ ;  $\diamond = (\text{NH}_4)_x\text{H}_{4-x}\text{PMo}_{11}\text{VO}_{40}$ ;  $\star = \text{C}_3\text{N}_4$ )

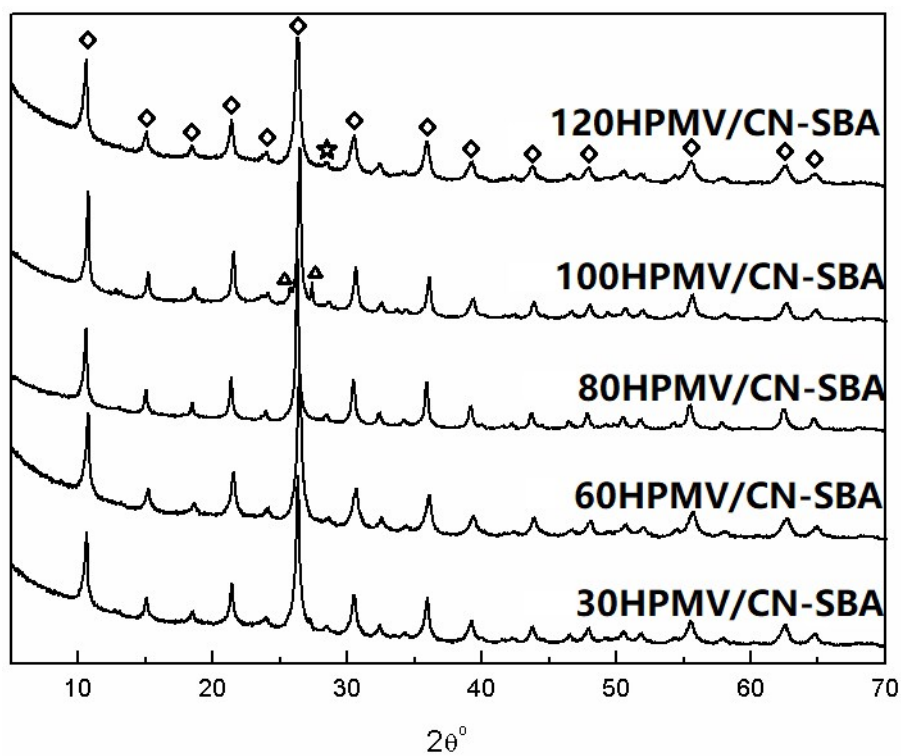

Figure S12. XRD patterns of calcined 2HPMV/CN-SBA synthesized at different temperatures. Catalysts were prepared at temperatures ranging from 30-120 °C with 2 h mixing and calcined at 360 °C for 12 h. Catalyst synthesis temperature indicated by prefix to HPMV/CN-SBA. Peak identification:  $\triangle$  = MoO<sub>3</sub>;  $\diamond$  = (NH<sub>4</sub>)<sub>x</sub>H<sub>4</sub>.

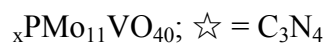



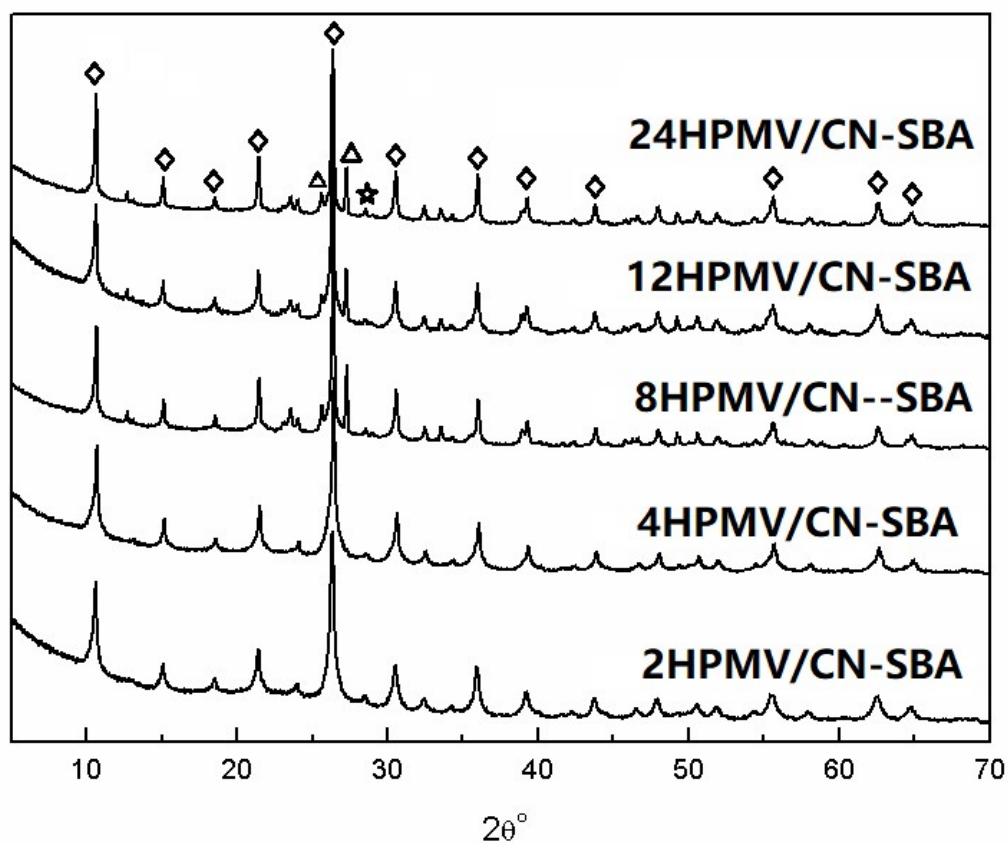

Figure S13. XRD patterns of calcined 2HPMV/CN-SBA synthesized with different mixing times. Catalysts were prepared at mixing times ranging from 2-24 h at a temperature of 80 °C and calcined at 360 °C for 12 h. Catalyst mixing time during synthesis indicated by prefix to HPMV/CN-SBA. Peak identification:  $\triangle = \text{MoO}_3$ ;  $\diamond$

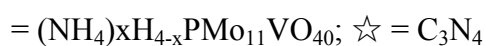

Table S1. Crystalline diameter of supported catalysts

| Catalysts                                           | Crystalline diameter/nm |
|-----------------------------------------------------|-------------------------|
| 0.5HPAV/C <sub>3</sub> N <sub>4</sub> -SBA          | 24.4                    |
| 1HPAV/C <sub>3</sub> N <sub>4</sub> -SBA            | 28.3                    |
| 2HPAV/C <sub>3</sub> N <sub>4</sub> -SBA            | 59.8                    |
| 3HPAV/C <sub>3</sub> N <sub>4</sub> -SBA            | 64.1                    |
| 4HPAV/C <sub>3</sub> N <sub>4</sub> -SBA            | 28.4                    |
| 5HPAV/C <sub>3</sub> N <sub>4</sub> -SBA            | 72.1                    |
| Calcined 0.5HPAV/C <sub>3</sub> N <sub>4</sub> -SBA | 29.3                    |
| Calcined 1HPAV/C <sub>3</sub> N <sub>4</sub> -SBA   | 27.5                    |
| Calcined 2HPAV/C <sub>3</sub> N <sub>4</sub> -SBA   | 26.5                    |
| Calcined 3HPAV/C <sub>3</sub> N <sub>4</sub> -SBA   | 31.2                    |
| Calcined 4HPAV/C <sub>3</sub> N <sub>4</sub> -SBA   | 35.4                    |
| Calcined 5HPAV/C <sub>3</sub> N <sub>4</sub> -SBA   | 44.1                    |

---

|                                                                   |      |
|-------------------------------------------------------------------|------|
| Used 0.5HPAV/C <sub>3</sub> N <sub>4</sub> -SBA                   | 33.5 |
| Used 1HPAV/C <sub>3</sub> N <sub>4</sub> -SBA                     | 30.3 |
| Used 2HPAV/C <sub>3</sub> N <sub>4</sub> -SBA                     | 29.2 |
| Used 3HPAV/C <sub>3</sub> N <sub>4</sub> -SBA                     | 33.7 |
| Used 4HPAV/C <sub>3</sub> N <sub>4</sub> -SBA                     | 33.5 |
| Used 5HPAV/C <sub>3</sub> N <sub>4</sub> -SBA                     | 38.8 |
| Calcined 4 <sup>h</sup> HPAV/C <sub>3</sub> N <sub>4</sub> -SBA   | 26.3 |
| Calcined 8 <sup>h</sup> HPAV/C <sub>3</sub> N <sub>4</sub> -SBA   | 23.4 |
| Calcined 12 <sup>h</sup> HPAV/C <sub>3</sub> N <sub>4</sub> -SBA  | 31.4 |
| Calcined 24 <sup>h</sup> HPAV/C <sub>3</sub> N <sub>4</sub> -SBA  | 26.7 |
| Calcined 30 <sup>o</sup> HPAV/C <sub>3</sub> N <sub>4</sub> -SBA  | 29.4 |
| Calcined 60 <sup>o</sup> HPAV/C <sub>3</sub> N <sub>4</sub> -SBA  | 44.7 |
| Calcined 100 <sup>o</sup> HPAV/C <sub>3</sub> N <sub>4</sub> -SBA | 46.2 |
| Calcined 120 <sup>o</sup> HPAV/C <sub>3</sub> N <sub>4</sub> -SBA | 49.0 |

---

The crystalline diameters of supported catalysts was calculated by Scherrer formula,  $D_{hkl} = k\lambda / \beta \cos \theta_{hkl}$  (Where  $k$  is shape factor, cubic is 0.9;  $\lambda$  is the wavelength of X-ray (1.075 nm);  $\beta$  is FWHM (radian);  $\theta_{hkl}$  is diffraction angle which is around 13<sup>o</sup> (radian).).

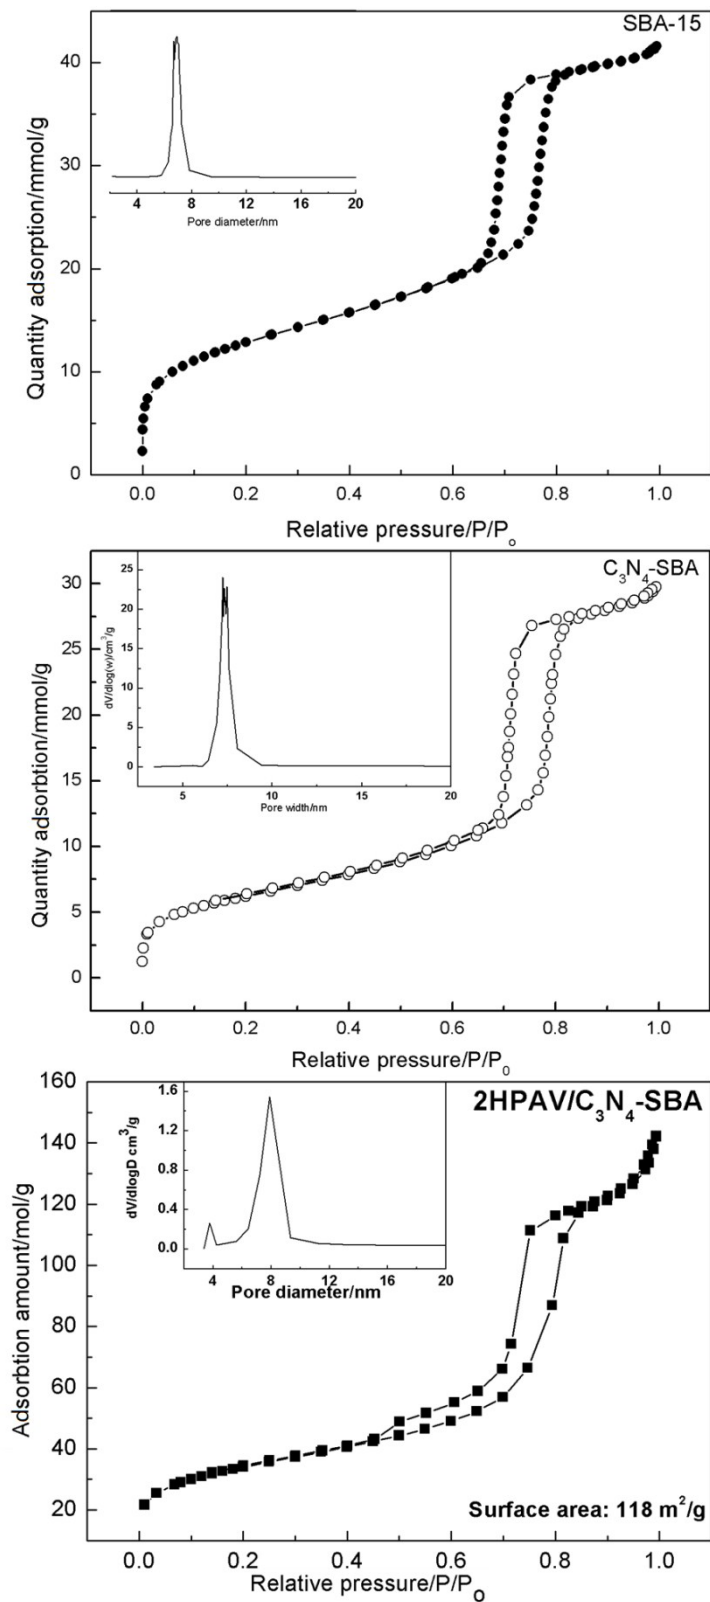

Figure S14. Nitrogen adsorption/desorption isotherms and (inset) pore size distribution of SBA-15, CN-SBA and 2HPMV/CN-SBA

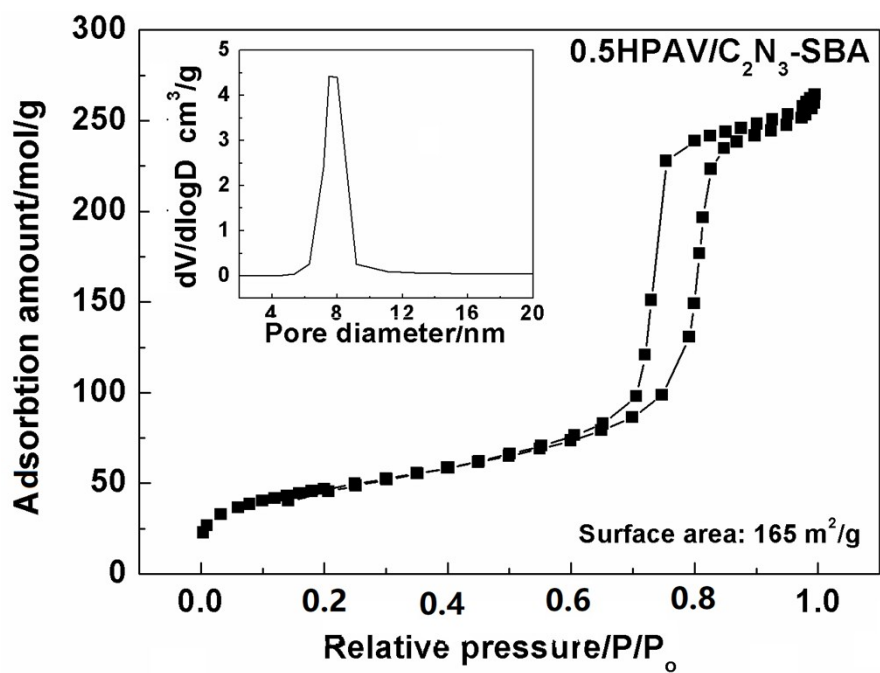

Figure S15. Nitrogen adsorption/desorption isotherms and (inset) pore size distribution of calcined 0.5HPMV/CN-SBA

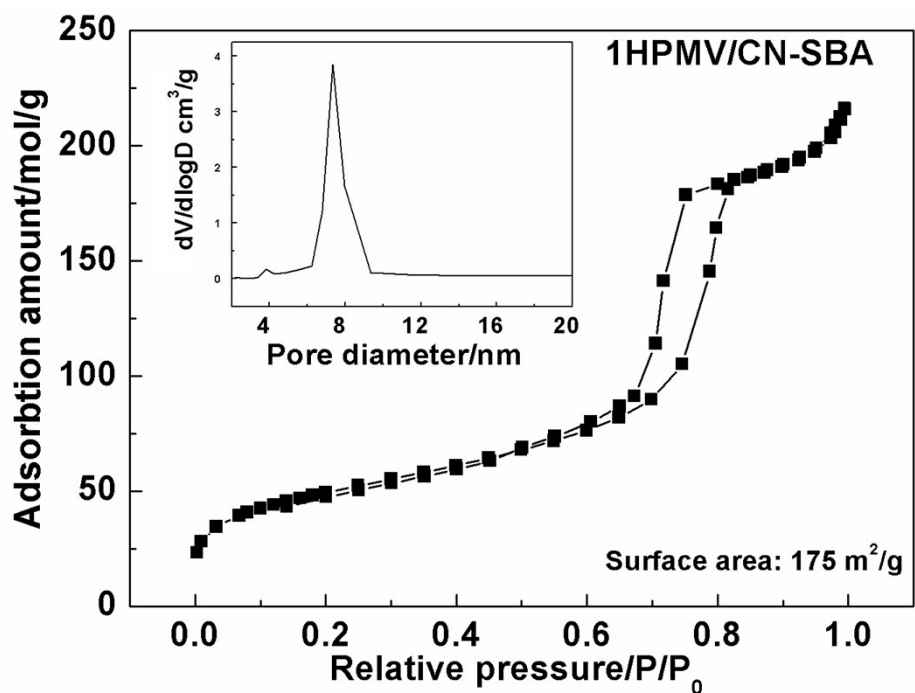

Figure S16. Nitrogen adsorption/desorption isotherms and (inset) pore size distribution of calcined 1HPMV/CN-SBA

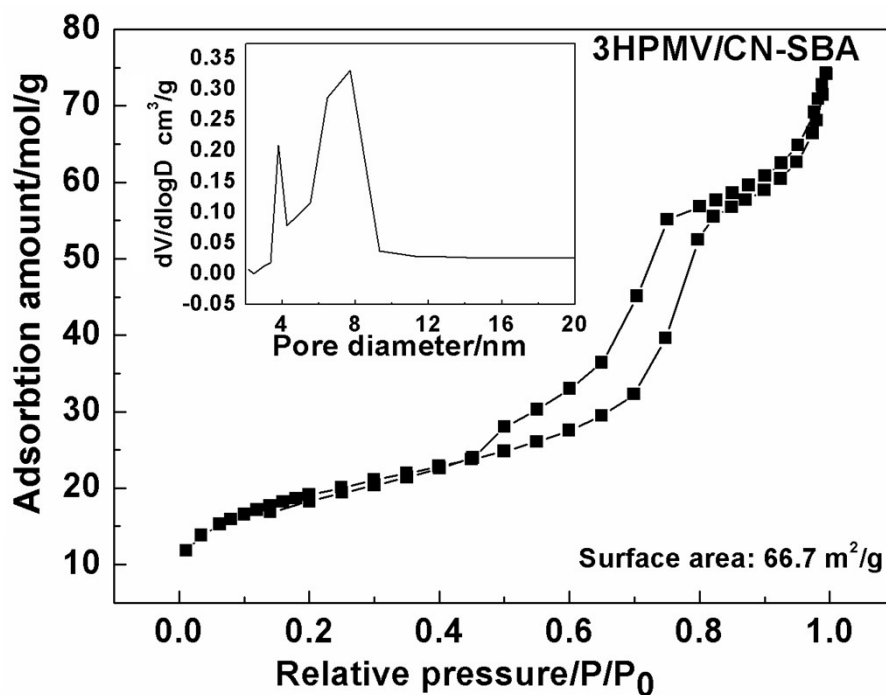

Figure S17. Nitrogen adsorption/desorption isotherms and (inset) pore size distribution of calcined 3HPMV/CN-SBA

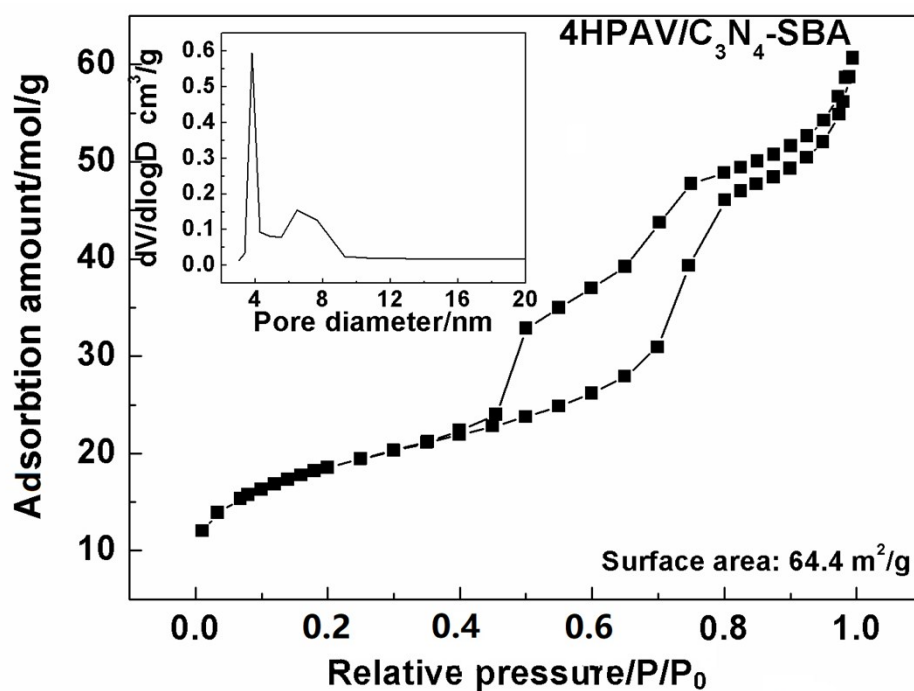

Figure S18. Nitrogen adsorption/desorption isotherms and (inset) pore size distribution of calcined 4HPMV/CN-SBA

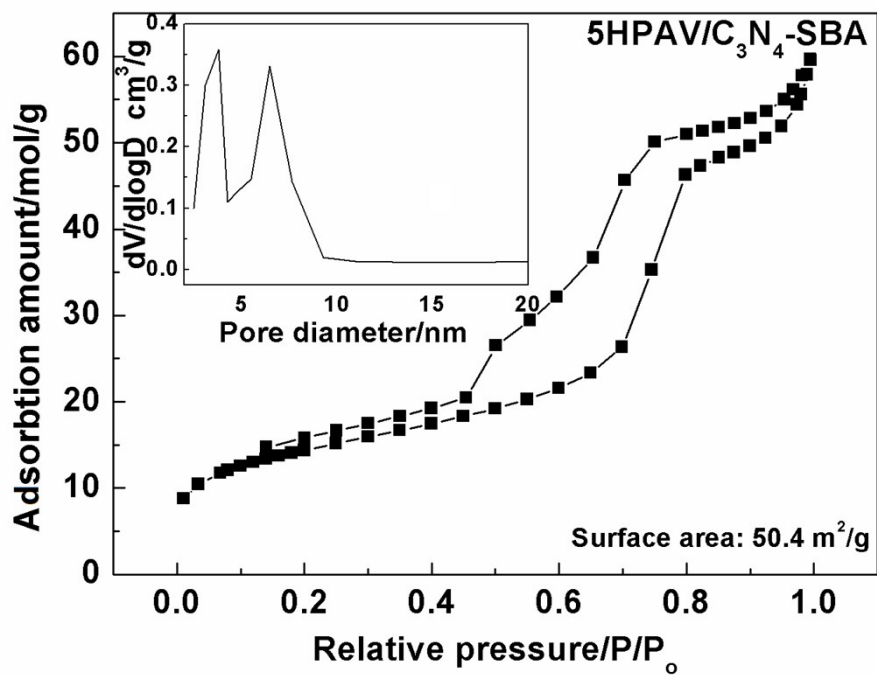

Figure S19. Nitrogen adsorption/desorption isotherms and (inset) pore size distribution of calcined 5HPMV/CN-SBA

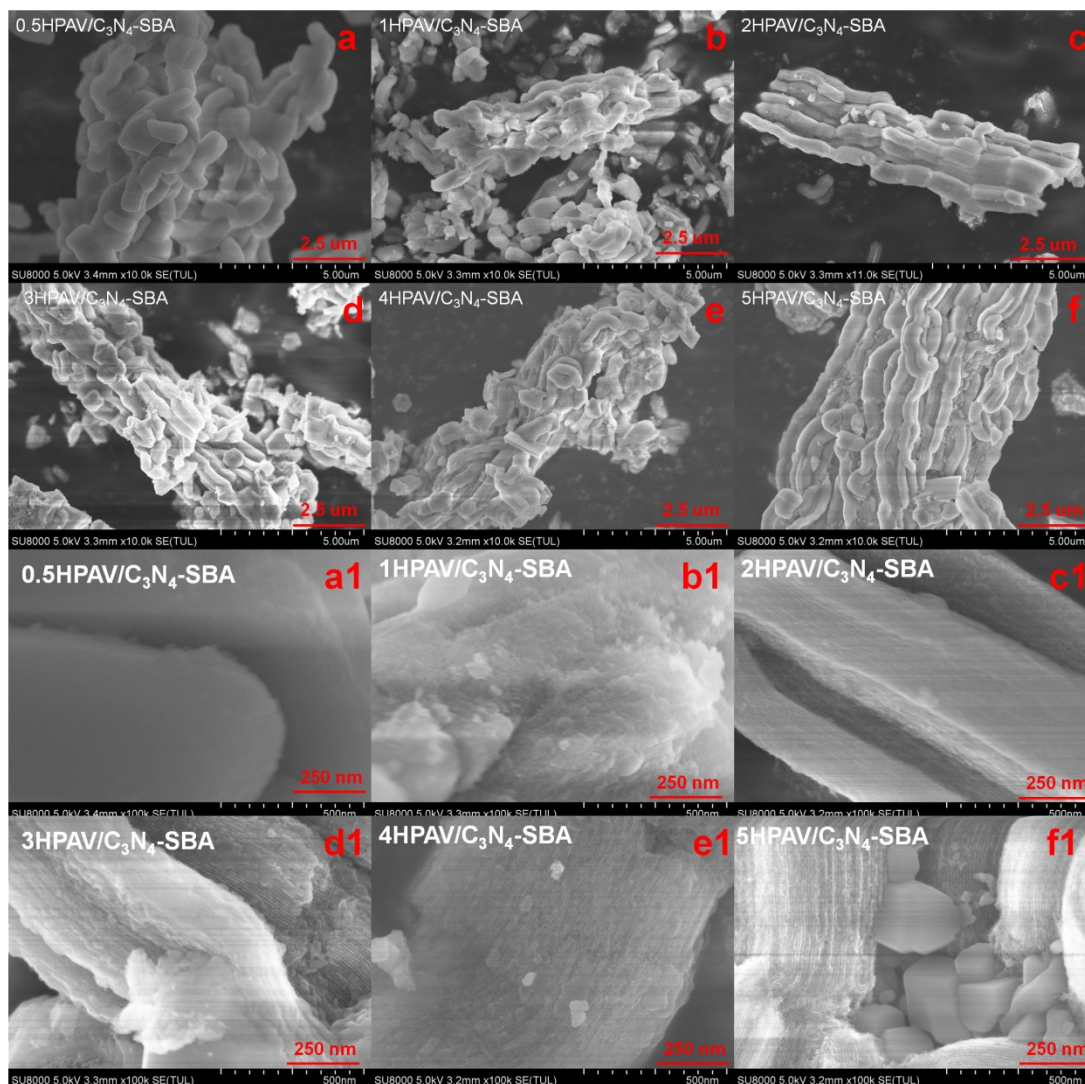

Figure S20. SEM images of HPMV/CN-SBA catalysts with different HPMV loadings (a, a1) 0.5HPMV/CN-SBA, (b, b1) 1HPMV/CN-SBA, (c, c1) 2HPMV/CN-SBA (d, d1) 3HPMV/CN-SBA, (e, e1) 4HPMV/CN-SBA, (f, f1) 5HPMV/CN-SBA

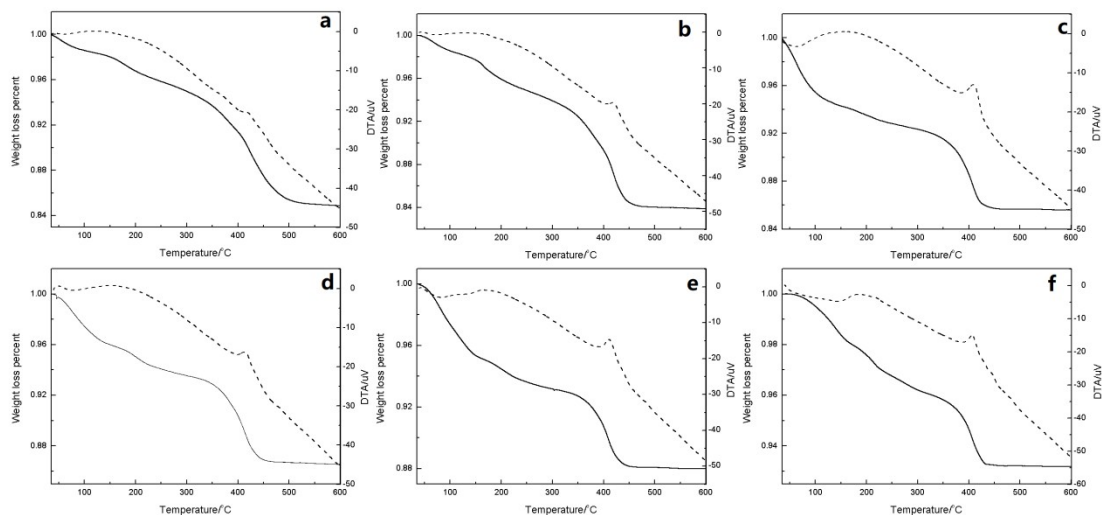

Figure S21. TG-DTA curves of HPMV/CN-SBA catalysts with different HPMV loadings (a) 0.5HPMV/CN-SBA, (b) 1HPMV/CN-SBA, (c) 2HPMV/CN-SBA (d) 3HPMV/CN-SBA, (e) 4HPMV/CN-SBA, (f) 5HPMV/CN-SBA

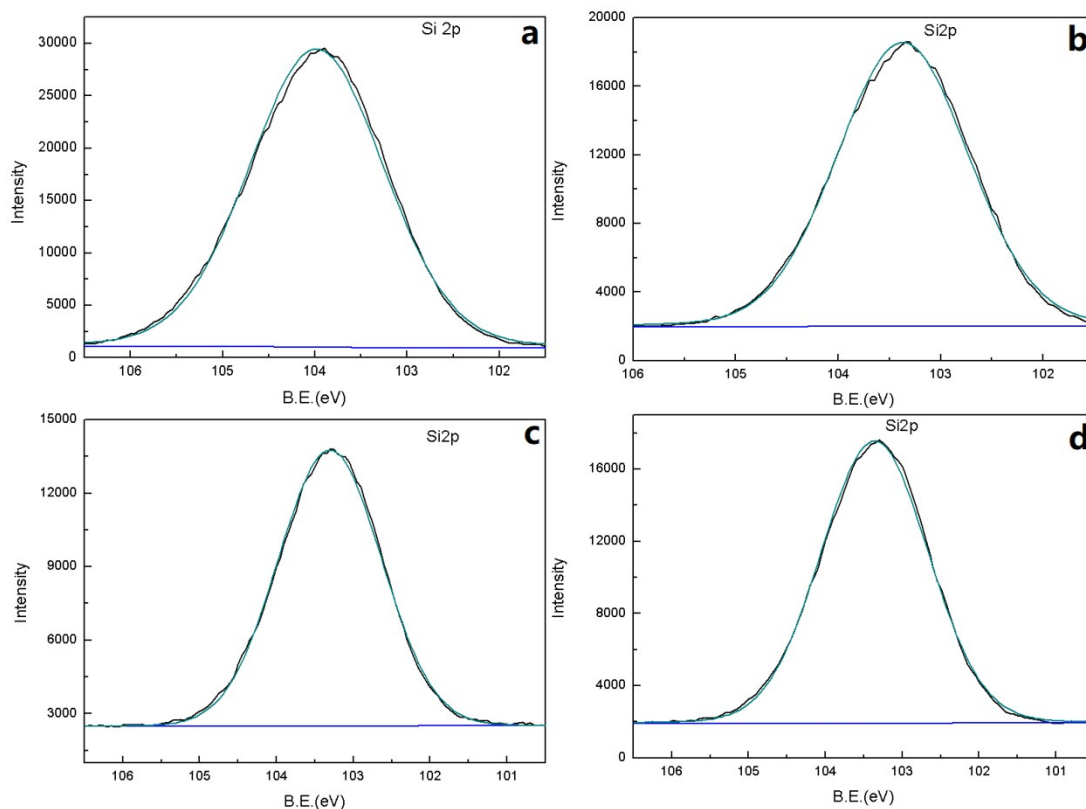

Figure S22. XPS spectra of Si 2p for (a) CN-SBA, and 3HPMV/CN-SBA (b) before calcination, (c) after calcination and (d) post-reaction. Catalysts were prepared at 80 °C with 2 h mixing and calcined at 360 °C for 12 h. Reaction conditions were: the volume percent (vol.%) of MAL, O<sub>2</sub> and H<sub>2</sub>O in the reactant stream was 4.4, 11.1,



and 17.8, with the balance  $N_2$  at 310 °C with 16 h.

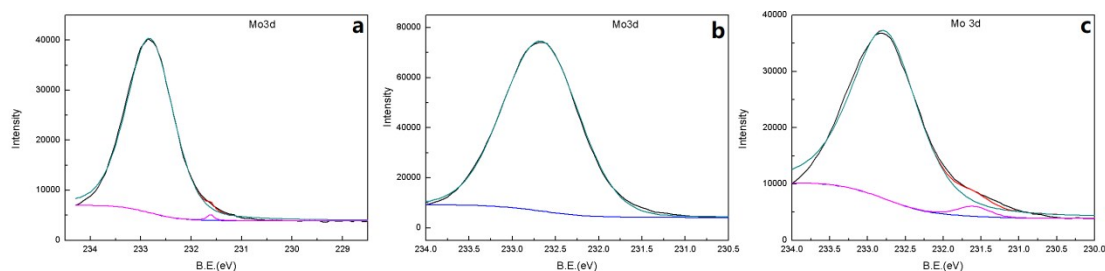

Figure S23. XPS spectra of Mo 3d for 3HPAV/CN-SBA (a) before calcination, (b) after calcination and (c) post-reaction. Catalysts were prepared at 80 °C with 2 h mixing and calcined at 360 °C for 12 h. Reaction conditions were: the volume percent (vol.%) of MAL,  $O_2$  and  $H_2O$  in the reactant stream was 4.4, 11.1, and 17.8, with the balance  $N_2$  at 310 °C with 16 h.

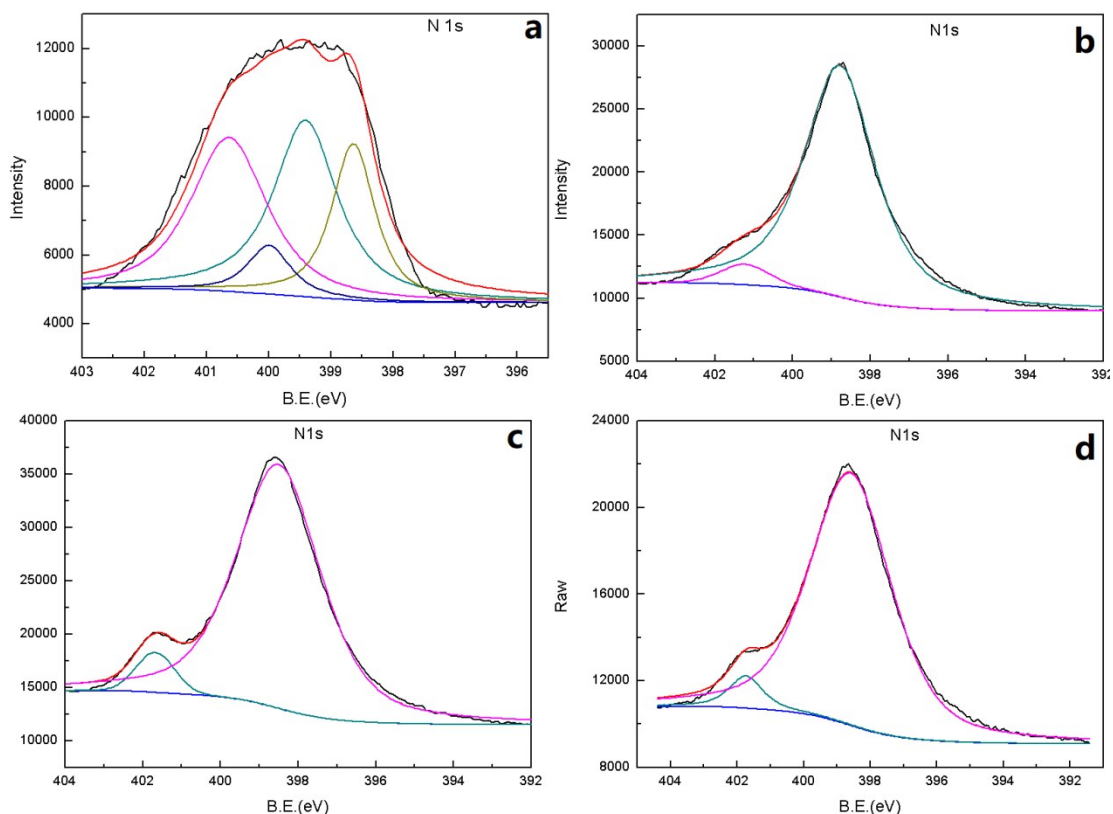

Figure S24. XPS spectra of N 1s for (a) CN-SBA and 3HPMV/CN-SBA (b) before calcination, (c) after calcination and (d) post-reaction. Catalysts were prepared at 80 °C with 2 h mixing and calcined at 360 °C for 12 h. Reaction conditions were: the volume percent (vol.%) of MAL,  $O_2$  and  $H_2O$  in the reactant stream was 4.4, 11.1, and 17.8, with the balance  $N_2$  at 310 °C with 16 h.

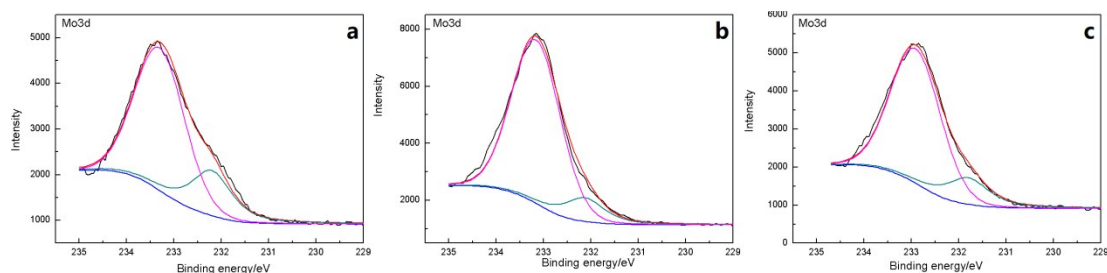

Figure S25. XPS spectra of Mo 3d for 3HPMV/SBA (a) before calcination, (b) after calcination and (c) post-reaction. Catalysts were prepared at 80 °C with 2 h mixing and calcined at 360 °C for 12 h. Reaction conditions were: the volume percent (vol.%) of MAL, O<sub>2</sub> and H<sub>2</sub>O in the reactant stream was 4.4, 11.1, and 17.8, with the balance N<sub>2</sub> at 310 °C with 16 h.

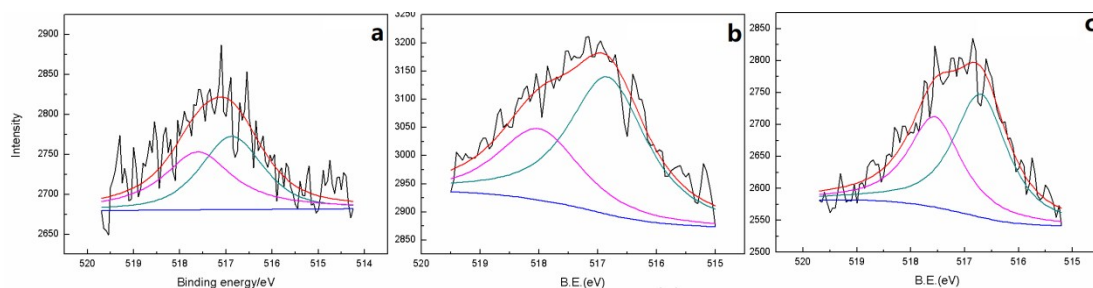

Figure S26. XPS spectra of V 2p for HPMV/SBA (a) before calcination, (b) after calcination and (c) post-reaction. Catalysts were prepared at 80 °C with 2 h mixing and calcined at 360 °C for 12 h. Reaction conditions were: the volume percent (vol.%) of MAL, O<sub>2</sub> and H<sub>2</sub>O in the reactant stream was 4.4, 11.1, and 17.8, with the balance N<sub>2</sub> at 310 °C with 16 h.

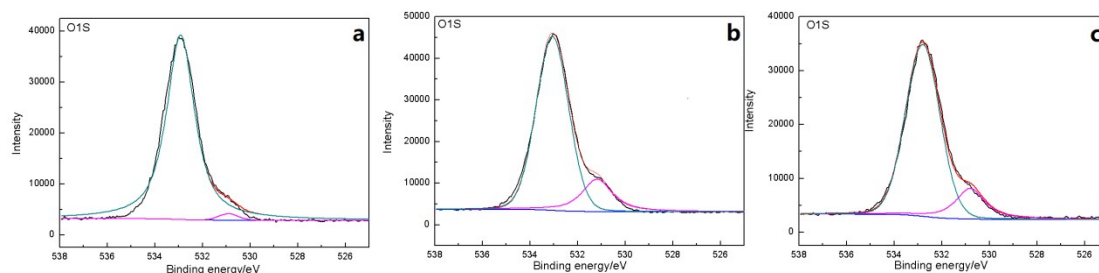

Figure S27. XPS spectra of O 1s for HPAV/SBA (a) before calcination, (b) after calcination and (c) post-reaction.

Table S2. Binding energies of N 1s, O1s, Mo 3d, V 2p and Si 2p for CN-SBA, 3HPMV/CN-SBA catalyst before calcinations, after calcinations or post-reaction

N 1s

| Catalysts | Peak1/<br>eV | Pea<br>k2/eV | Pea<br>k3/eV | Pea<br>k4/eV | Area ratio of<br>different peaks |
|-----------|--------------|--------------|--------------|--------------|----------------------------------|
|-----------|--------------|--------------|--------------|--------------|----------------------------------|

|                            |       |       |       |       |               |
|----------------------------|-------|-------|-------|-------|---------------|
| CN-SBA                     | 400.6 | 400.0 | 399.4 | 398.6 | 5.3:1:5.6:3.2 |
| 3HPMV/CN-SBA               | 401.2 |       |       | 398.8 | 1:20.2        |
| Calcined 3HPMV/CN-SBA      | 401.7 |       |       | 398.5 | 1:16.3        |
| Post-reaction 3HPMV/CN-SBA | 401.7 |       |       | 398.6 | 1:17.5        |

#### V 2p

| <i>Catalysts</i>       | <i>Peak 1/eV</i> | <i>Peak 2/eV</i> | <i>Area ratio of Peak 1 and Peak 2</i> |
|------------------------|------------------|------------------|----------------------------------------|
| 3HPMV/CN-SBA           | 517.1            | 516.1            | 1.2:1                                  |
| Calcined 3HPMV/CN-SBA  | 517.2            | 516.1            | 1.8:1                                  |
| Used 3HPMV/CN-SBA      | 517.4            | 516.5            | 1:1.3                                  |
| HPMV/SBA               | 517.60           | 516.70           | 2.0:1                                  |
| Calcined HPMV/SBA      | 517.56           | 516.81           | 1:1                                    |
| Post-reaction HPMV/SBA | 517.51           | 516.65           | 1.1:1                                  |

#### Mo 3d

| <i>Catalysts</i>        | <i>Peak 1/eV</i> | <i>Peak 2/eV</i> | <i>Area ratio of Peak 1 and Peak 2</i> |
|-------------------------|------------------|------------------|----------------------------------------|
| 3HPMV/CN-SBA            | 232.8            | 231.6            | 144.3:1                                |
| Calcined 3HPMV/CN-SBA   | 232.7            | --               | --                                     |
| Used 3HPMV/CN-SBA       | 232.8            | 231.6            | 40.3:1                                 |
| 4HPMV/SBA               | 233.30           | 232.20           | 3:1                                    |
| Calcined 4HPMV/SBA      | 233.20           | 232.13           | 5.8:1                                  |
| Post-reaction 4HPMV/SBA | 232.91           | 231.80           | 4.5:1                                  |

#### Si 2p

| <i>Catalysts</i>           | <i>Peak 1/eV</i> |
|----------------------------|------------------|
| CN-SBA                     | 103.4            |
| 3HPMV/CN-SBA               | 103.4            |
| Calcined 3HPMV/CN-SBA      | 103.3            |
| Post-reaction 3HPMV/CN-SBA | 103.4            |

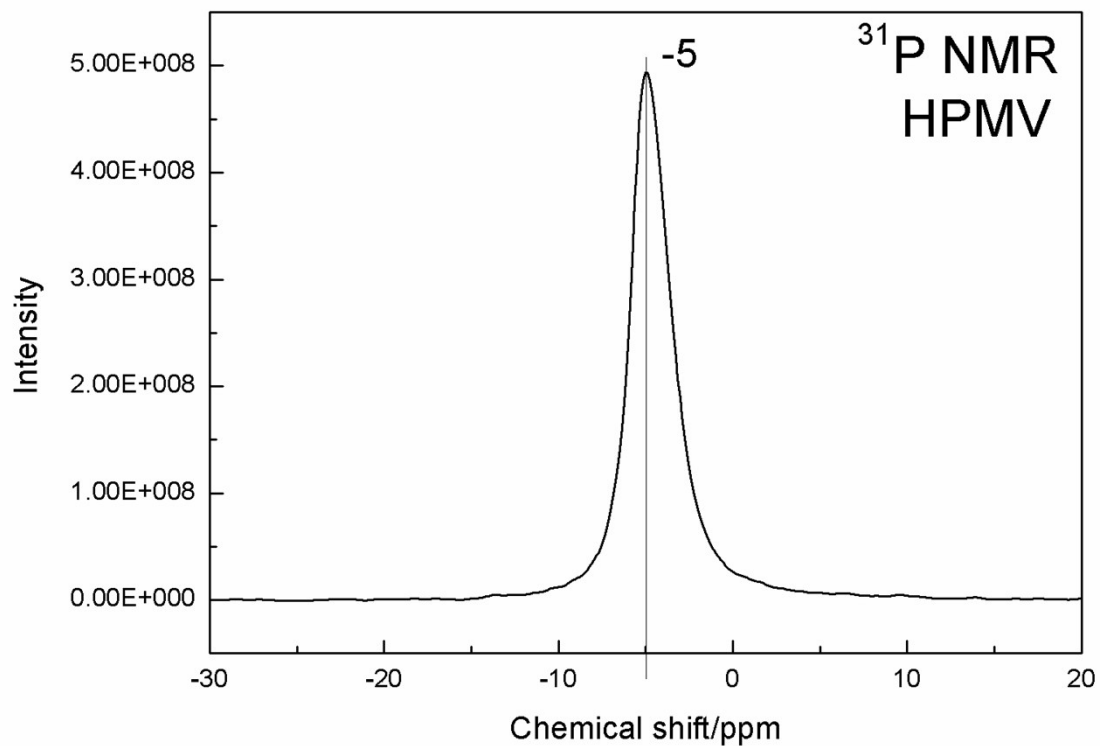

Figure S28. <sup>31</sup>P NMR spectrum of HPMV

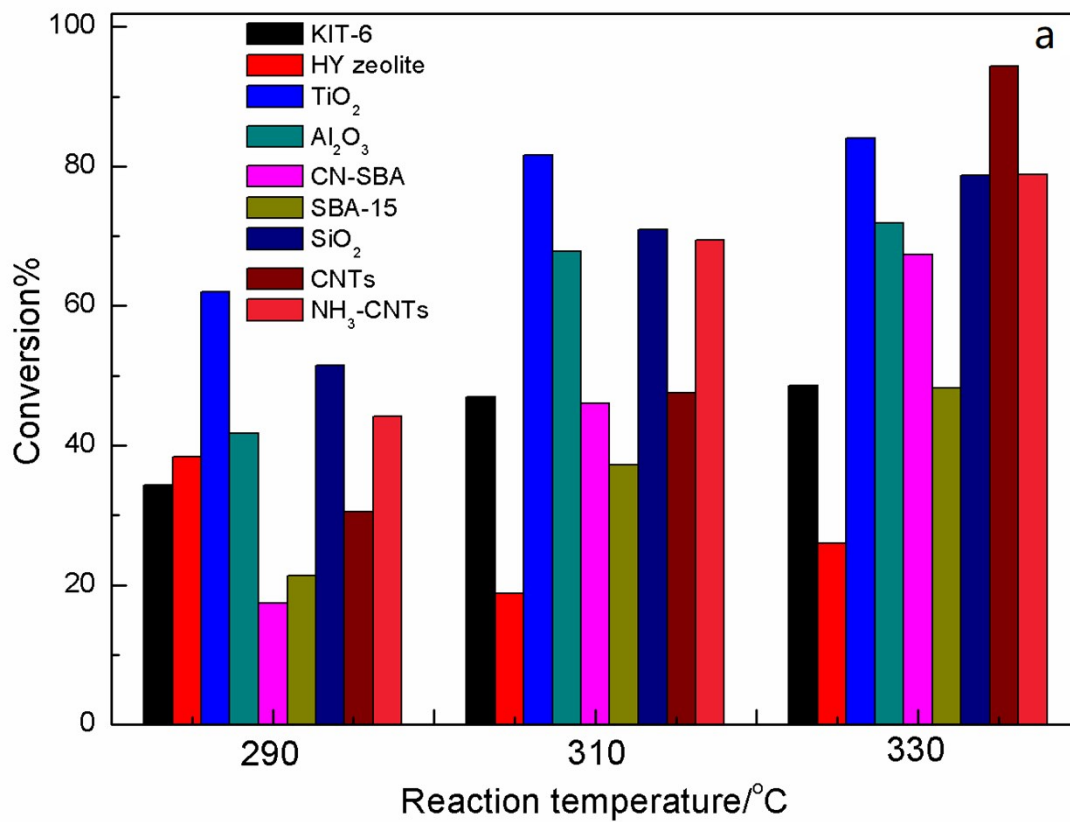

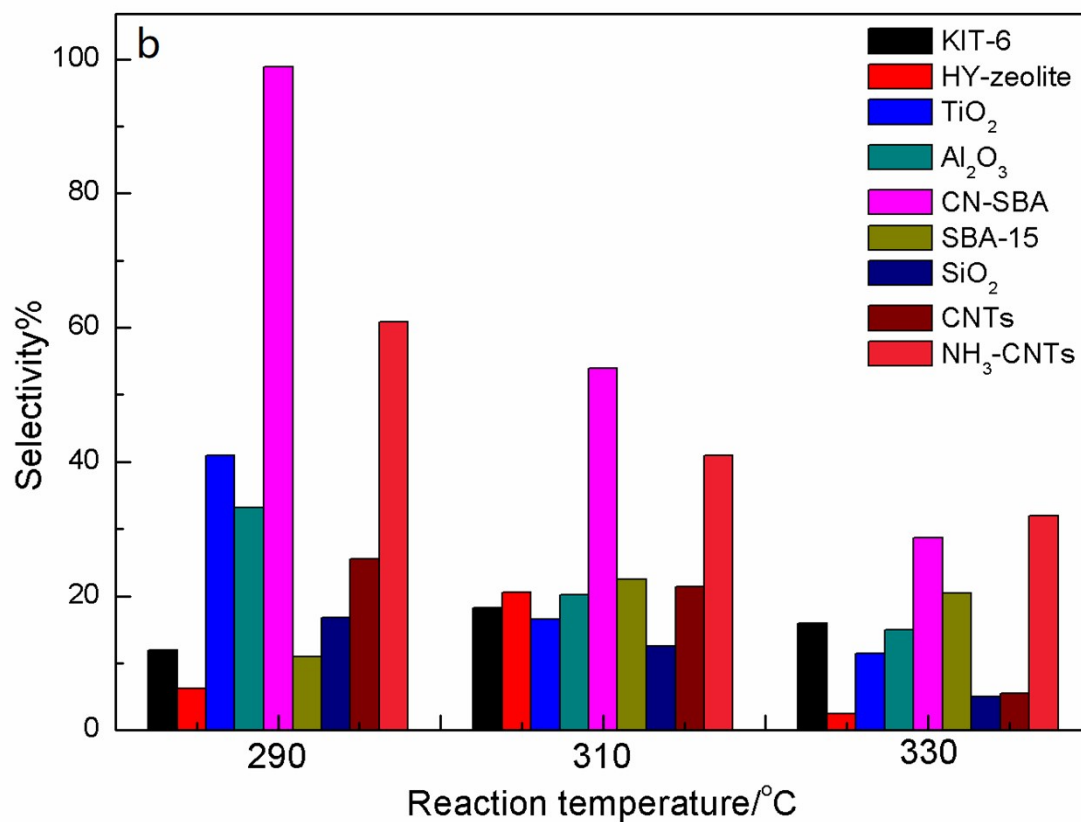

Figure S29. MAL conversion and MAA selectivity over HPMV supported on KIT-6, HY zeolite, TiO<sub>2</sub>, Al<sub>2</sub>O<sub>3</sub>, CN-SBA, SBA-15, SiO<sub>2</sub>, CNTs, NH<sub>3</sub>-CNTs at 290, 310 and 330 °C, respectively. The volume ratio of MAL, O<sub>2</sub> and H<sub>2</sub>O in the reactant stream were 4.4 vol.%, 11.1 vol.%, 17.8 vol.%, respectively, N<sub>2</sub> balance.

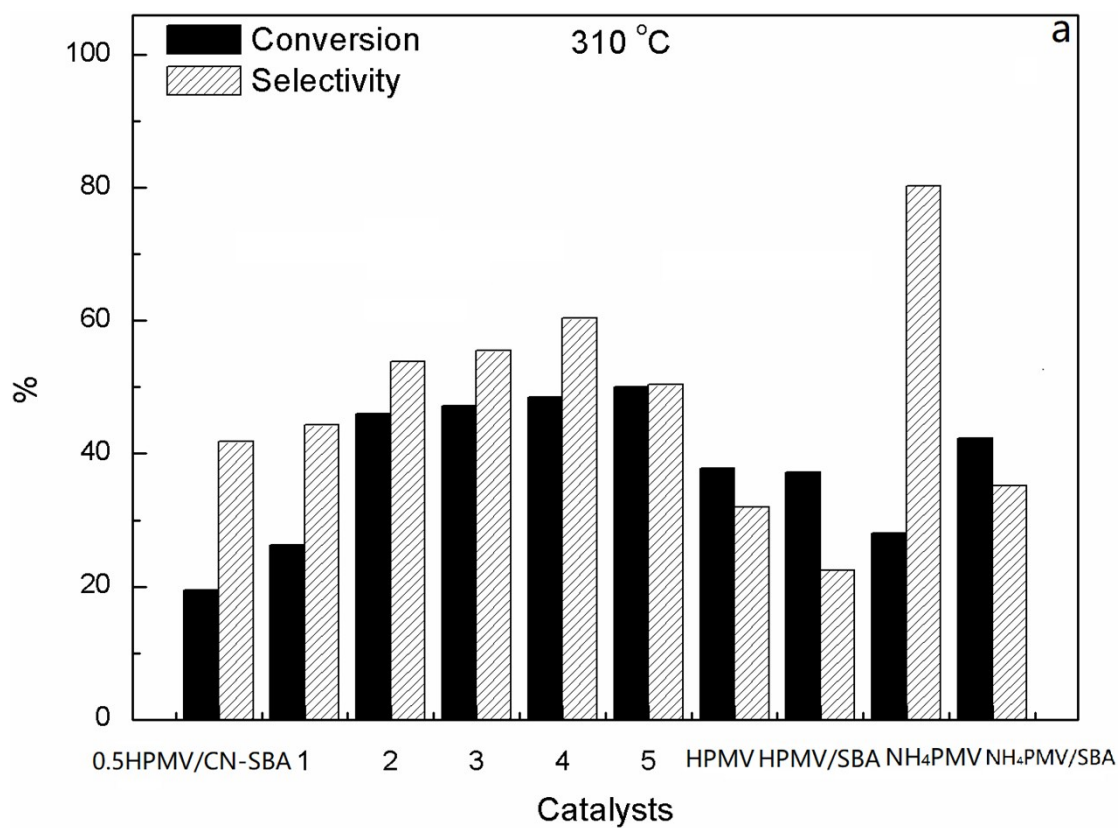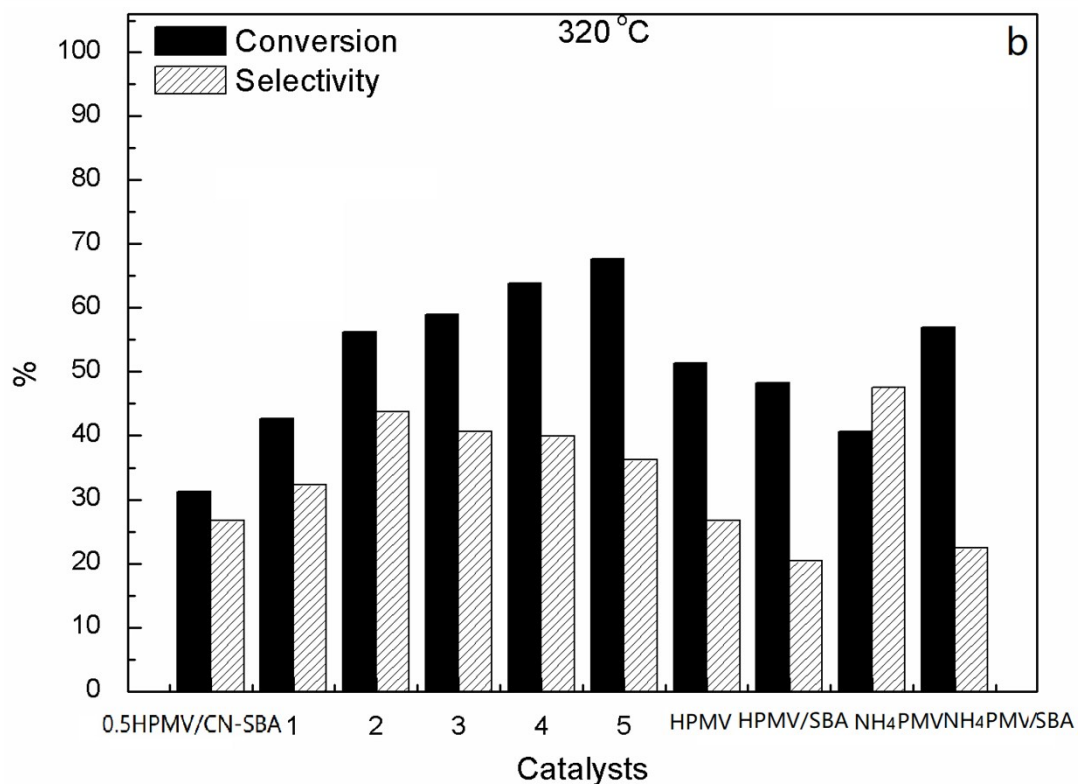

Figure S30. MAL conversion and MAA selectivity over 0.5HPMV/CN-SBA, 1HPMV/CN-SBA (1), 2HPMV/CN-SBA (2), 3HPMV/CN-SBA (3), 4HPMV/CN-SBA (4), 5HPMV/CN-SBA (5), HPMV, HPMV/SBA-15, NHPMV and NHPMV/SBA at (a) 310 °C and (b) 320 °C. The volume ratio of MAL, O<sub>2</sub> and H<sub>2</sub>O in the reactant

stream were 4.4 vol.%, 11.1 vol.%, 17.8 vol.%, respectively, N<sub>2</sub> balance.

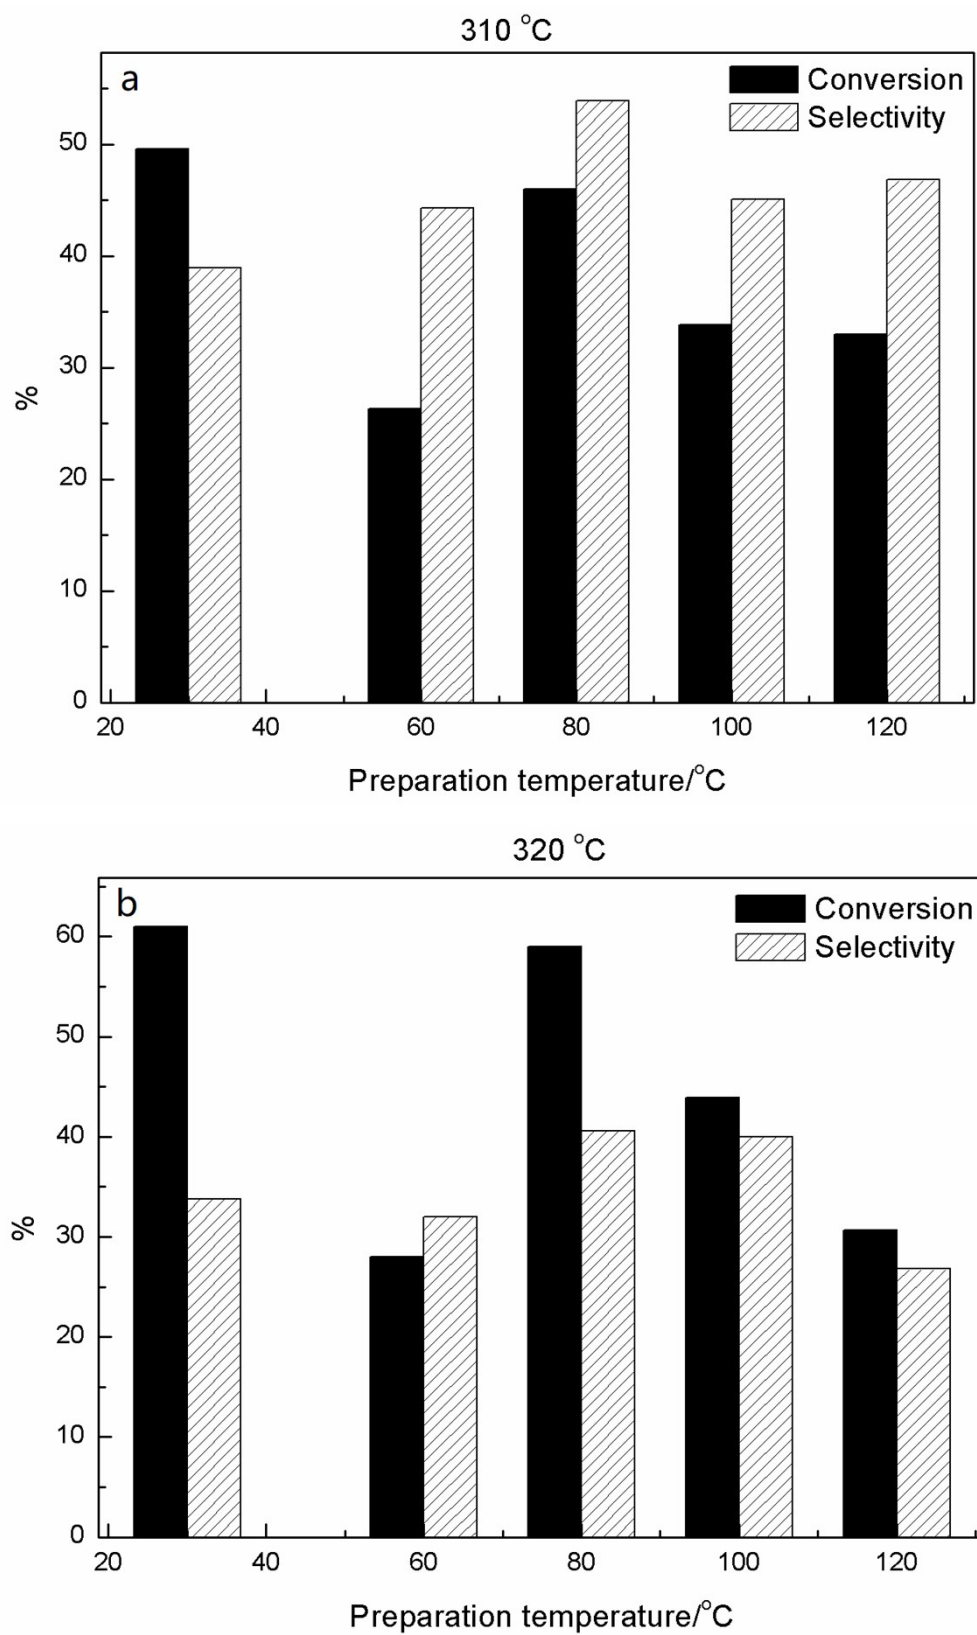

Figure S31. Effect of synthesis temperature on MAL conversion and MAA selectivity over 2HPMV/CN-SBA at reaction temperatures of (a) 310 °C and (b) 320

°C. The volume ratio of MAL, O<sub>2</sub> and H<sub>2</sub>O in the reactant stream were 4.4 vol.%, 11.1 vol.%, 17.8 vol.%, respectively, N<sub>2</sub> balance.

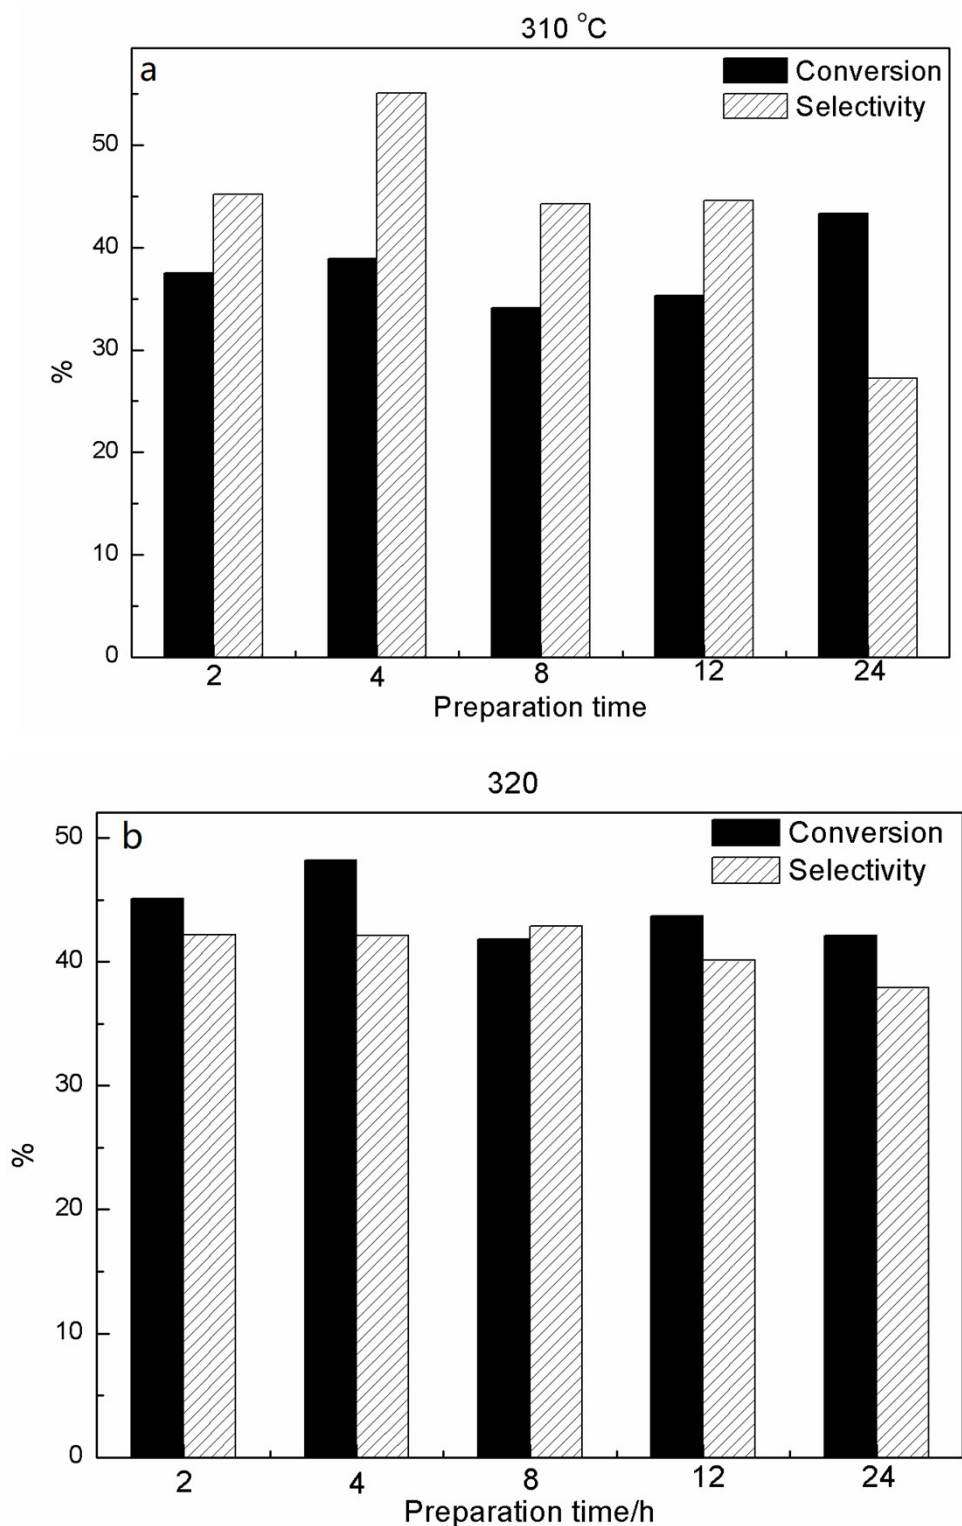

Figure S32. Effect of mixing time during synthesis on MAL conversion and MAA selectivity over 2HPMV/CN-SBA at reaction temperatures of (a) 310 °C and (b)



320 °C. The volume ratio of MAL, O<sub>2</sub> and H<sub>2</sub>O in the reactant stream were 4.4 vol.%, 11.1 vol.%, 17.8 vol.%, respectively, N<sub>2</sub> balance.

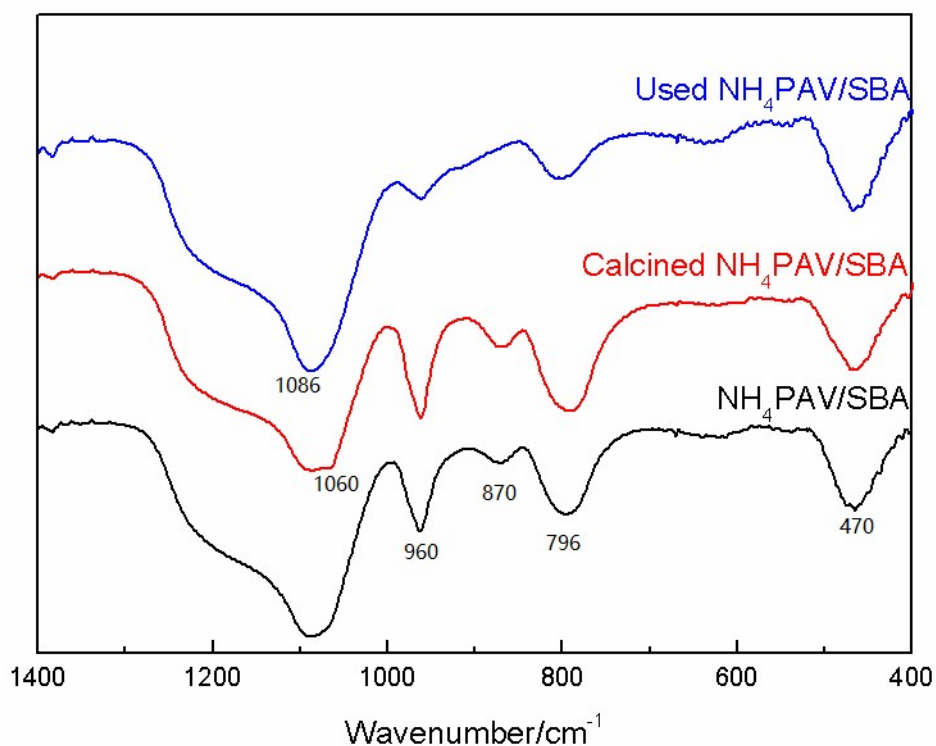

Figure S33. FT-IR spectra of NHPMV/SBA before calcination, after calcination and post-reaction. Catalysts were prepared at 80 °C with 2 h mixing and calcined at 360 °C for 12 h. Reaction conditions were: the volume percent (vol.%) of MAL, O<sub>2</sub> and H<sub>2</sub>O in the reactant stream was 4.4, 11.1, and 17.8, with the balance N<sub>2</sub> at 310 °C with 16 h.

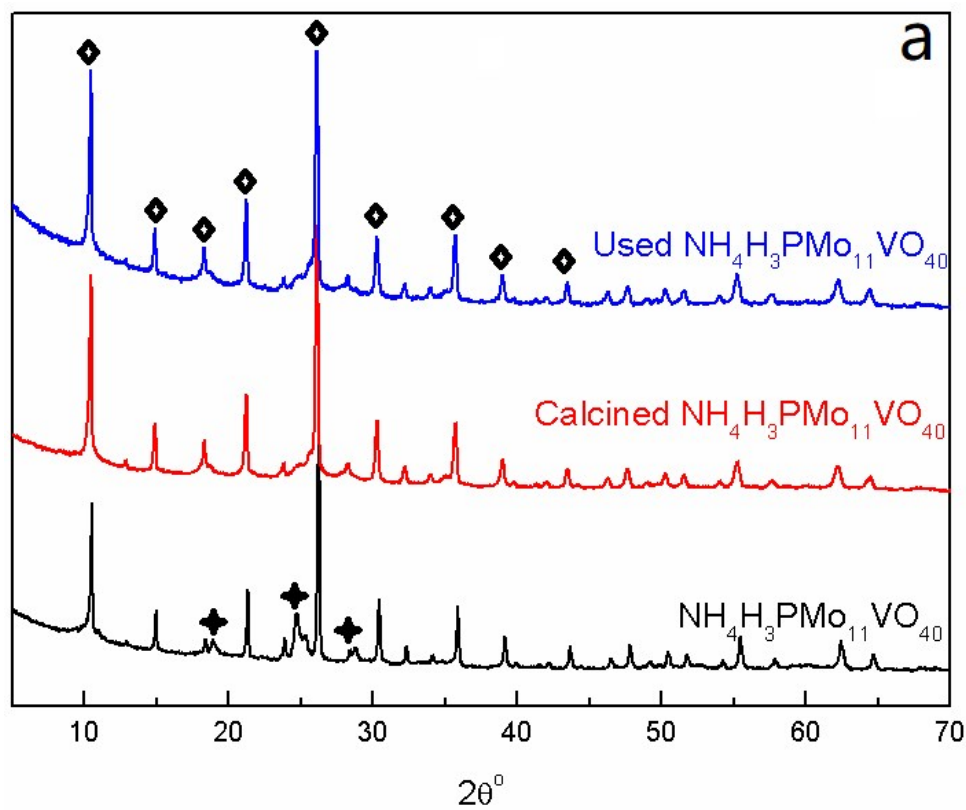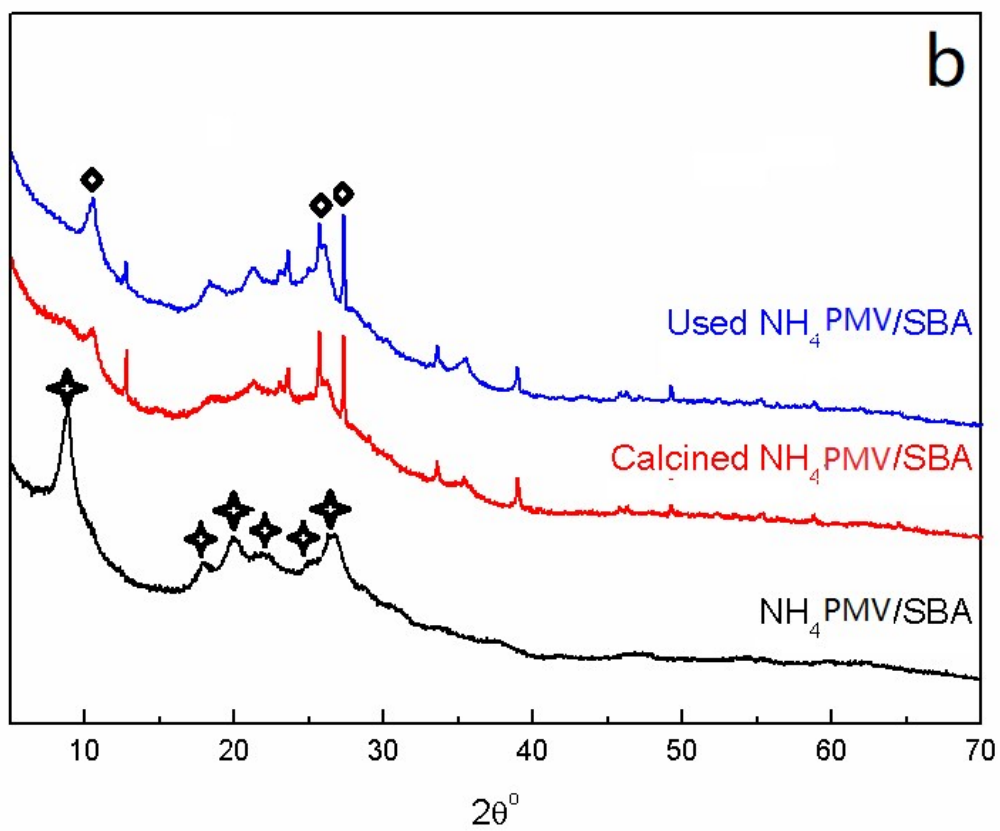

Figure S34. XRD patterns of  $\text{NH}_4\text{PMV}$ ,  $\text{NH}_4\text{PMV/SBA}$  before calcination, after calcination and post-reaction. Catalysts were prepared at 80 °C with 2 h mixing and

calcined at 360 °C for 12 h. Reaction conditions were the volume percent (vol.%) of MAL, O<sub>2</sub> and H<sub>2</sub>O in the reactant stream was 4.4, 11.1, and 17.8, with the balance N<sub>2</sub> at 310 °C with 16 h.. Peak identification: quadrangular star = HPAV  $\diamond$  = (NH<sub>4</sub>)<sub>x</sub>H<sub>4</sub>.

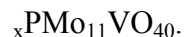

Table S3. Weak and strong acid sites and amount of each for calcined neat HPMV, neat NH<sub>4</sub>PMV and HPMV/CN-SBA catalysts with different HPMV loadings.

Catalysts were prepared at 80 °C with 2 h mixing and calcined at 360 °C for 12 h.

| <i>Catalysts</i>    | <i>Weak acid sites<br/>(°C)</i> | <i>Acid amount 1<br/>(mmol/g)</i> | <i>Strong acid<br/>sites (°C)</i> | <i>Acid amount 2<br/>(mmol/g)</i> |
|---------------------|---------------------------------|-----------------------------------|-----------------------------------|-----------------------------------|
| 0.5HPMV/CN-SBA      | 115                             | 0.176                             | 448                               | 0.156                             |
| 1HPMV/CN-SBA        | 116                             | 0.151                             | 445                               | 0.287                             |
| 2HPMV/CN-SBA        | 127                             | 0.081                             | 453                               | 0.376                             |
| 3HPMV/CN-SBA        | 113                             | 0.127                             | 456                               | 0.373                             |
| 4HPMV/CN-SBA        | 213                             | 0.123                             | 459                               | 0.390                             |
| 5HPMV /CN-SBA       | 110                             | 0.167                             | 459                               | 0.410                             |
| HPMV                | 114                             | 0.396                             | 467                               | 0.298                             |
| NH <sub>4</sub> PMV | 113                             | 0.148                             | 471                               | 0.340                             |

Table S4. (NH<sub>4</sub>)<sub>x</sub>H<sub>4-x</sub>PMV crystal diameter for calcined HPMV/CN-SBA catalysts with different HPMV loadings. Catalysts were prepared at 80 °C with 2 h mixing and calcined at 360 °C for 12 h. Values determined from XRD profiles using Scherrer equation.

| <i>Catalysts</i>                           | <i>Crystalline diameter/nm</i> |
|--------------------------------------------|--------------------------------|
| 0.5HPAV/C <sub>3</sub> N <sub>4</sub> -SBA | 24.4                           |
| 1HPAV/C <sub>3</sub> N <sub>4</sub> -SBA   | 28.3                           |
| 2HPAV/C <sub>3</sub> N <sub>4</sub> -SBA   | 59.8                           |
| 3HPAV/C <sub>3</sub> N <sub>4</sub> -SBA   | 64.1                           |
| 4HPAV/C <sub>3</sub> N <sub>4</sub> -SBA   | 68.4                           |
| 5HPAV/C <sub>3</sub> N <sub>4</sub> -SBA   | 72.1                           |
